# Supplementary material
Source: MDPI journal article supplement (https://www.mdpi.com/2304-6740/11/7/282)
Supplement: s1 [file s1]

## Supporting Information

### Iron<sup>III</sup>-Complexes with *N*-Phenylpyrazole-based Ligands

Tanja Hirschhausen<sup>1†</sup>, Lorena Fritsch<sup>1†</sup>, F. Lux<sup>1</sup>, J. Steube<sup>1</sup>, R. Schoch<sup>1</sup>, A. Neuba<sup>1</sup>, H. Egold<sup>1</sup> and M. Bauer<sup>1,2\*</sup>

<sup>1</sup> Institute of Inorganic Chemistry, Paderborn University, Paderborn, Germany.

<sup>2</sup> Center for Sustainable Systems Design, Paderborn University, Paderborn, Germany

\* Correspondence: matthias.bauer@upb.de

† These authors contributed equally to this work.

## Contents

|                                             |    |
|---------------------------------------------|----|
| General procedure .....                     | 1  |
| General procedure of complex synthesis..... | 2  |
| Fe(ppz) <sub>3</sub> .....                  | 2  |
| Fe(bppz) <sub>3</sub> .....                 | 9  |
| Fe(CF <sub>3</sub> ppz) <sub>3</sub> .....  | 15 |
| Fe(naphpz) <sub>3</sub> .....               | 20 |
| Fe(MeOppz) <sub>3</sub> .....               | 27 |
| Illumination Experiments .....              | 32 |
| Computational.....                          | 34 |
| X-ray emission spectroscopy .....           | 39 |
| Single Crystal X-Ray Diffraction .....      | 40 |
| References .....                            | 45 |

## General procedure

Synthesis of ligands and complexes were carried out under standard Schlenk conditions, under inert and anhydrous conditions. Inert and pre-dried argon was used, and all applied glass wear was heated and re-filled with argon at least three times. Water free solvents were provided by a solvent drying-plant by MBraun (MB SPS 800) and purged with argon prior use. Used chemicals for all synthesis were commercially purchased by the following providers: *Fischer Scientific*, *Merck*, *Abcr*, and *TCl*, and used without further purification. Ligand synthesis has been reported in literature.<sup>1,2</sup>

NMR spectra were recorded on a BRUKER Avance 700 (<sup>1</sup>H, 700.1 MHz) using deuterated solvents by *Deutero* without further purification. NMR signals were referred to residual solvent signals relative to TMS. Mass spectrometry was measured with a quadrupol time-of-flight mass spectrometer (MS) Synapt 2G by the company WATERS. Elemental analysis measurements were performed with a Micro Cube by ELEMENTAR and were compared with the theoretical calculated mass. A **PerkinElmer** Lambda 465 single beam spectrophotometer was used for Uv-Vis spectra. Concentrations contained a 10<sup>-5</sup> M complex solution in BuCN, and were filled in a **Hellma** quartz cuvette with a pathlength of 1 cm. For IR spectroscopy a Bruker Vertex 70, with the sample as solid powder and the ATR-technique, was applied. Cyclic voltammograms were measured with a 10<sup>-3</sup> M analyte and 0.1 M [*n*-Bu<sub>4</sub>N](PF<sub>6</sub>) concentration on

a PGSTAT 101 potentiostat from **Metrohm-Autolab**. Emission spectra were recorded on a FLS1000 from **Edinburgh Instruments** at room-temperature.

### General procedure of complex synthesis

Under Argon atmosphere respective ligand (3 equiv) was suspended in tetrahydrofuran (THF) (10 mL). Ethylmagnesium bromide (4 equiv, 0.9 M in THF) was added dropwise and refluxed overnight. In a second round button flask, iron powder (12 equiv) was added to THF solution of iron(II) bromide (1.5 equiv) (40 mL) and refluxed overnight. After refluxing, the flask was cooled to room-temperature and the ligand-solution was cooled in an ethanol-nitrogen bath to -80°C. The iron(II) bromide solution was added dropwise and slowly warmed to room temperature under an argon atmosphere. To the reaction mixture a solution of NH<sub>4</sub>Cl (100 mL, 15 g/L) was added, and extracted with dichloromethane (DCM) (3x100 mL). The combined organic portions were dried with MgSO<sub>4</sub> and concentrated under reduced pressure. Column chromatography with silica as solid phase and DCM as eluent was applied. The combined fractions were concentrated under reduced pressure and crystallized with slow diffusion of cyclopentane into the DCM-analyte solution. After removing the crystalline product and drying at 50°C at high vacuum, the compound was received as elemental analysis pure product.

### Fe(ppz)<sub>3</sub>

The complex was obtained as yellow powder (7.5%)

<sup>1</sup>H-NMR (700.0 MHz, CD<sub>3</sub>CN): δ = -75.20 (s, 1H, 2-H), -9.27 (s, 1H, 9-H), -5.25 (s, 1H, 4-H), -3.35 (s, 1H, 8-H), -1.15 (s, 1H, 5-H), 7.90 (s, 1H, 3-H), 13.04 (s, 1H, 7-H) ppm.

<sup>13</sup>C-NMR (176.1 MHz, CD<sub>3</sub>CN): δ = -92.7 (1C, 3-C), -74.8 (1C, 5-C), 100.2 (1C, 7-C), 117.0 (1C, 8-C), 122.9 (1C, 9-C), 239.9 (1C, 4-C), 389.1 (1C, 2-C), 396.6 (1C, 6-C) ppm.

<sup>15</sup>N-NMR (70.96 MHz, CD<sub>3</sub>CN): 70.4 ppm. (ESI in MeCN): m/z 485.1160 (for C<sub>27</sub>H<sub>21</sub>FeN<sub>6</sub> calc. 485.1177)

**Elemental analysis:** calc. for C<sub>27</sub>H<sub>21</sub>FeN<sub>6</sub> C: 66.82%, H: 4.36%, N: 17.32%, found: C: 66.77%, H: 4.56%, N: 17.25%.

**IR** (ATR,  $\tilde{\nu}$  [cm<sup>-1</sup>]): 3139w, 3041w, 1573w, 1506w, 1461m, 1434m, 1417m, 1398m, 1328w, 1270m, 1236w, 1193w, 1153w, 1099w, 1064m, 1043m, 1012m, 960m, 918w, 871w, 825w, 742s, 715m, 698m, 661w, 644w, 609m.

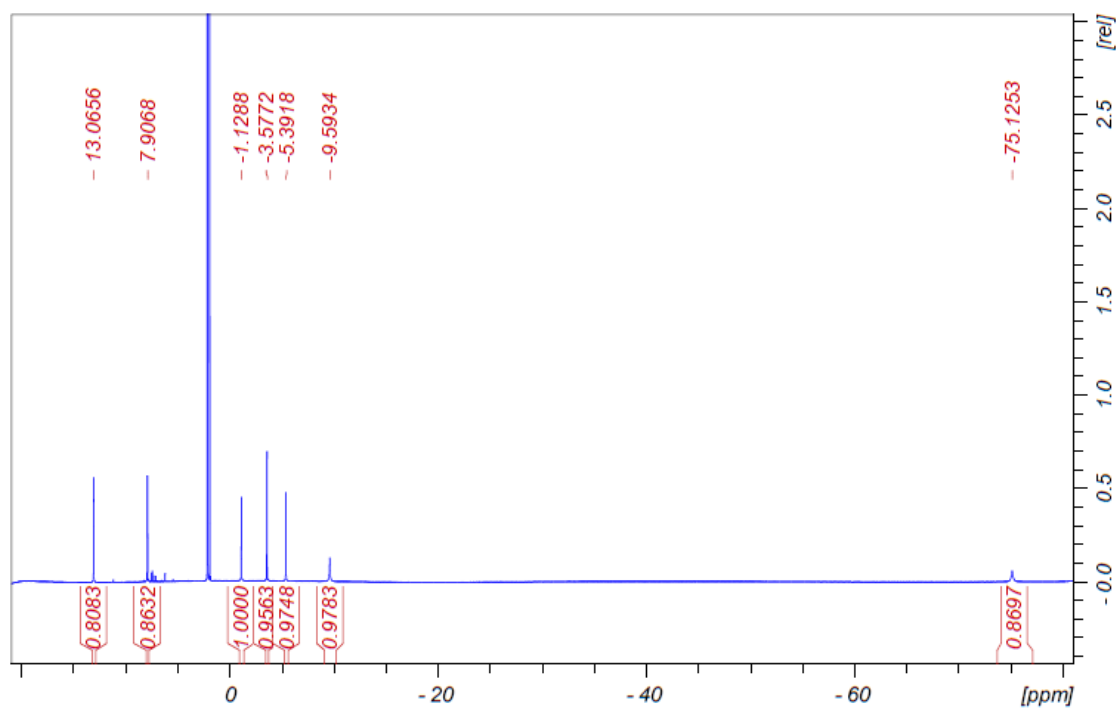

Figure S1:  $^1\text{H}$ -NMR spectrum of complex  $\text{Fe}(\text{ppz})_3$  in  $\text{CD}_3\text{CN}$

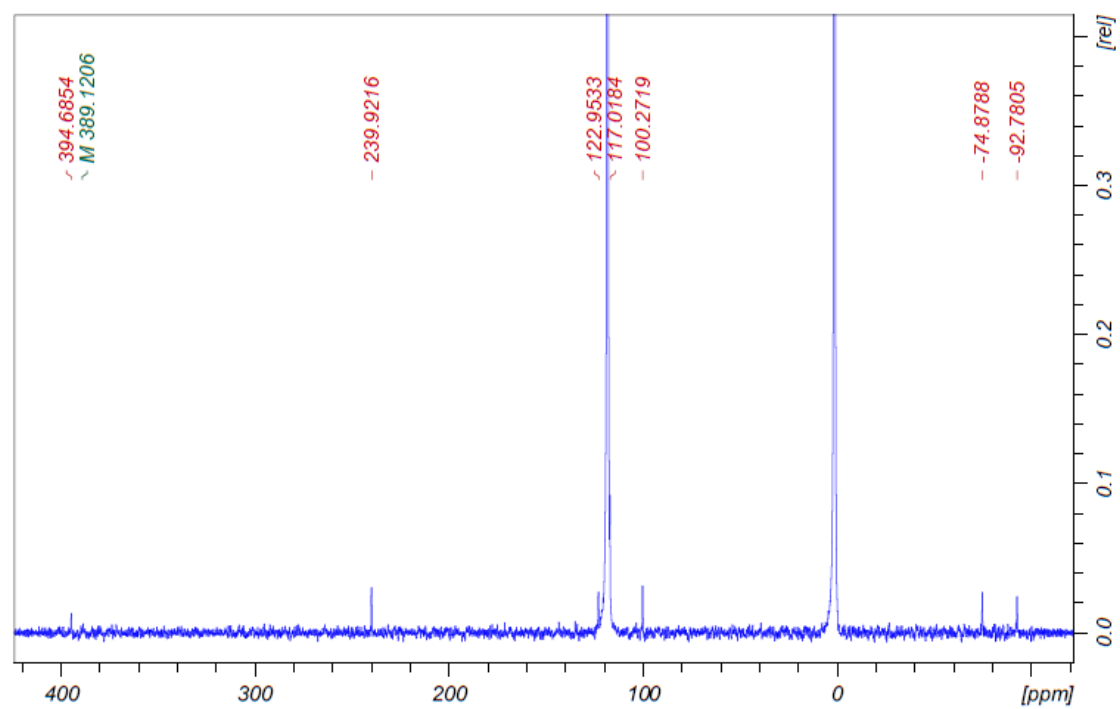

Figure S2:  $^{13}\text{C}$ -NMR spectrum of complex  $\text{Fe}(\text{ppz})_3$  in  $\text{CD}_3\text{CN}$

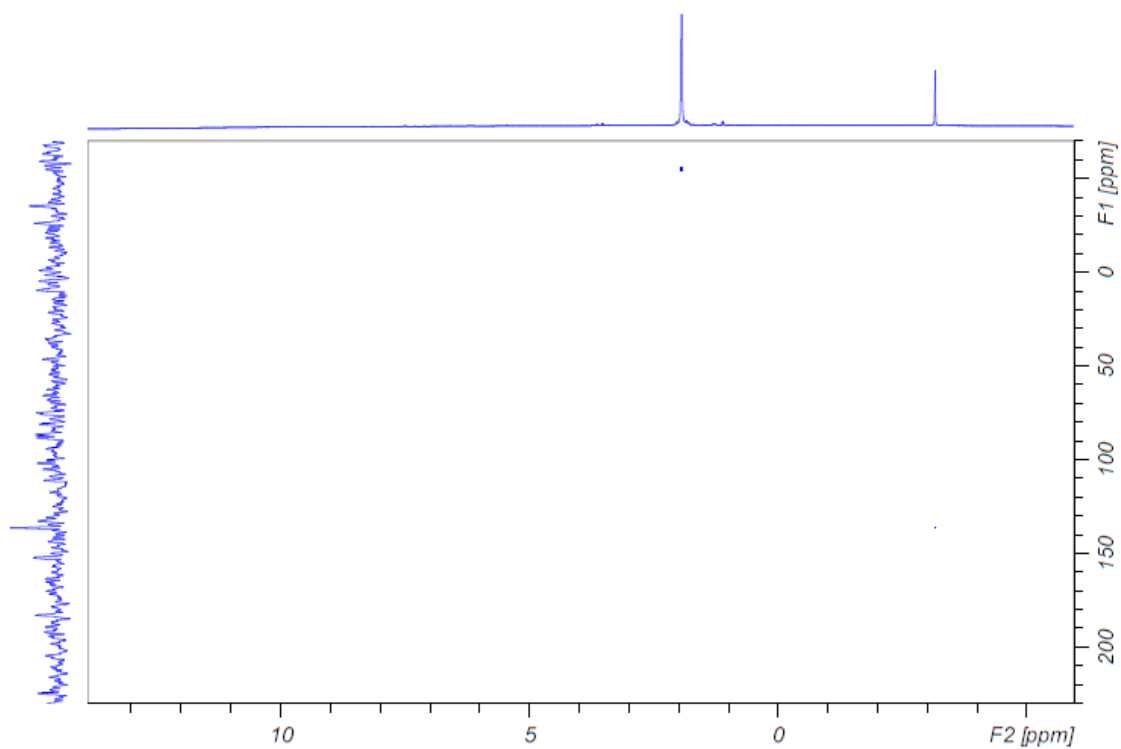

**Figure S3:**  $^{15}\text{N}$ -HMBC spectrum of  $\text{Fe}(\text{ppz})_3$  in  $\text{CD}_3\text{CN}$ , second signal is the folded signal of non-deuterated solvent  $\text{CH}_3\text{CN}$

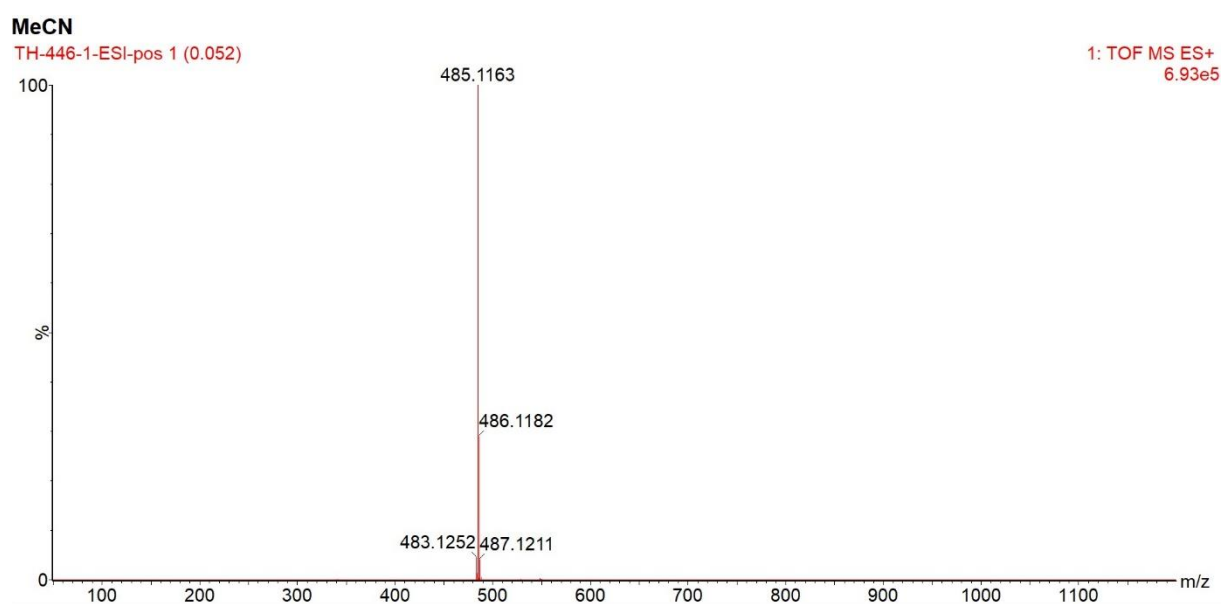

**Figure S4:** ESI-MS spectrum of complex  $\text{Fe}(\text{ppz})_3$  in  $\text{CH}_3\text{CN}$

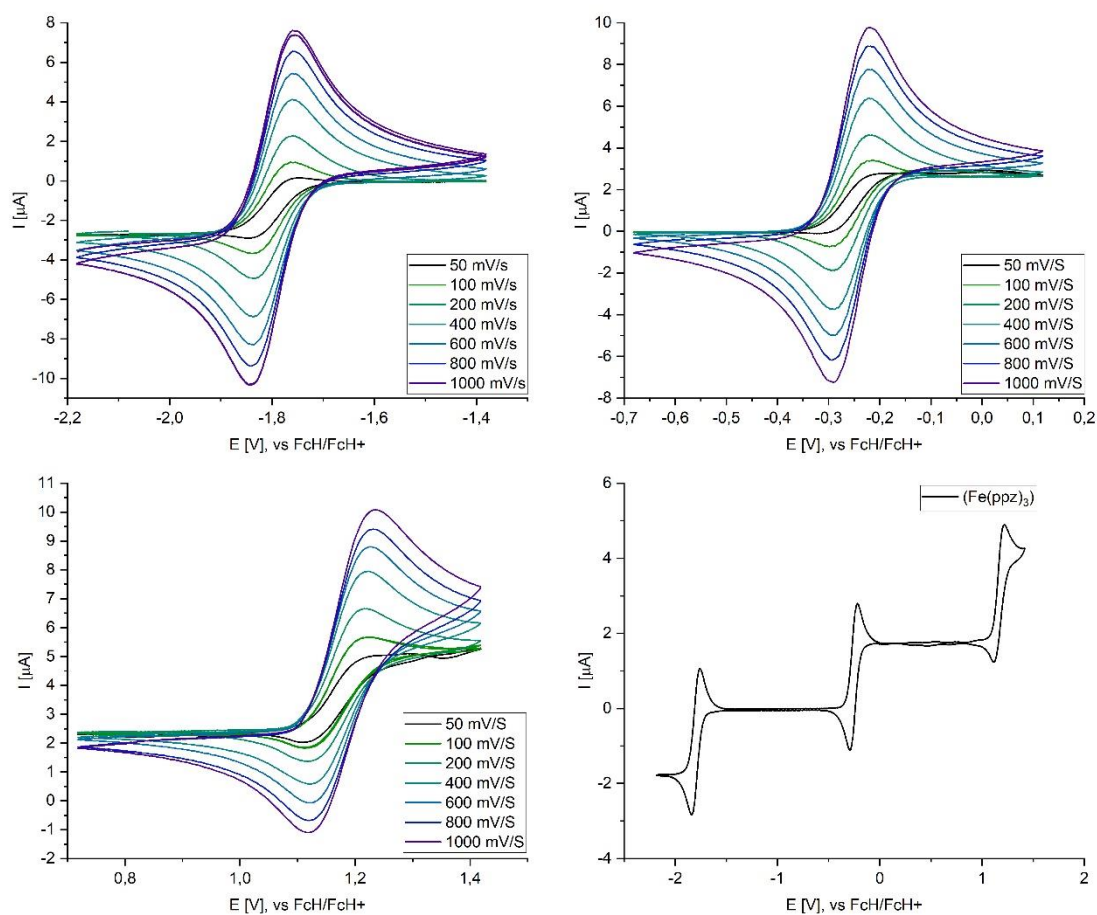

**Figure S5:** Complete cyclic voltammetry spectra for complex  $\text{Fe}(\text{ppz})_3$  in  $\text{CH}_3\text{CN}$

**Table S1:** Cyclic voltammetry data for  $\text{Fe}(\text{ppz})_3$  at different scan rates, first redox step

| SCANRATE                      | [MV/S] | 50     | 100    | 200    | 400    | 600    | 800    | 1000   |
|-------------------------------|--------|--------|--------|--------|--------|--------|--------|--------|
| $E_{\text{PC}}$               | [V]    | -1,835 | -1,828 | -1,833 | -1,835 | -1,835 | -1,840 | -1,838 |
| $E_{\text{PA}}$               | [V]    | -1,762 | -1,765 | -1,759 | -1,762 | -1,760 | -1,760 | -1,762 |
| $E_{1/2}$                     | [V]    | -1,80  | -1,80  | -1,80  | -1,80  | -1,80  | -1,80  | -1,80  |
| $\Delta E$                    | [V]    | 0,073  | 0,063  | 0,074  | 0,073  | 0,076  | 0,081  | 0,076  |
| $I_{\text{PA}}$               | [μA]   | -1,68  | -2,73  | -4,11  | -5,76  | -7,11  | -8,17  | -9,07  |
| $I_{\text{PC}}$               | [μA]   | 1,64   | 2,78   | 4,11   | 5,87   | 7,14   | 8,24   | 9,14   |
| $I_{\text{PA}}/I_{\text{PC}}$ |        | -0,98  | -1,02  | -1,00  | -1,02  | -1,00  | -1,01  | -1,01  |

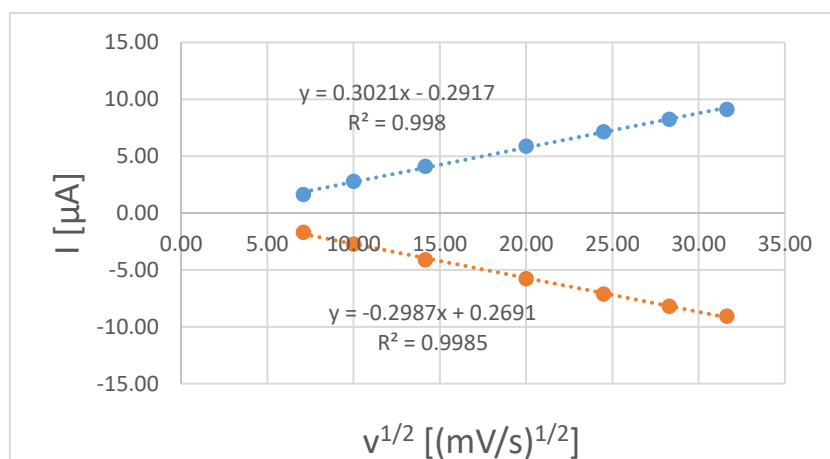

**Figure S6:** Plotted data of Randles-Sevcik-Equation Fe(ppz)<sub>3</sub> at different scan rates, first redox step

**Table S2:** Cyclic voltammetry data for Fe(ppz)<sub>3</sub> at different scan rates, second redox step

| SCANRATE        | [MV/S] | 50     | 100    | 200    | 400    | 600    | 800    | 1000   |
|-----------------|--------|--------|--------|--------|--------|--------|--------|--------|
| $E_{PC}$        | [V]    | -0,296 | -0,286 | -0,289 | -0,289 | -0,289 | -0,294 | -0,291 |
| $E_{PA}$        | [V]    | -0,223 | -0,225 | -0,223 | -0,223 | -0,225 | -0,223 | -0,223 |
| $E_{1/2}$       | [V]    | -0,26  | -0,26  | -0,26  | -0,26  | -0,26  | -0,26  | -0,26  |
| $\Delta E$      | [V]    | 0,073  | 0,061  | 0,066  | 0,066  | 0,063  | 0,071  | 0,068  |
| $I_{PA}$        | [μA]   | -1,88  | -2,65  | -3,80  | -5,43  | -6,88  | -8,00  | -9,00  |
| $I_{PC}$        | [μA]   | 1,55   | 2,41   | 3,80   | 5,53   | 6,69   | 7,79   | 8,72   |
| $I_{PA}/I_{PC}$ |        | -0,83  | -0,91  | -1,00  | -1,02  | -0,97  | -0,97  | -0,97  |

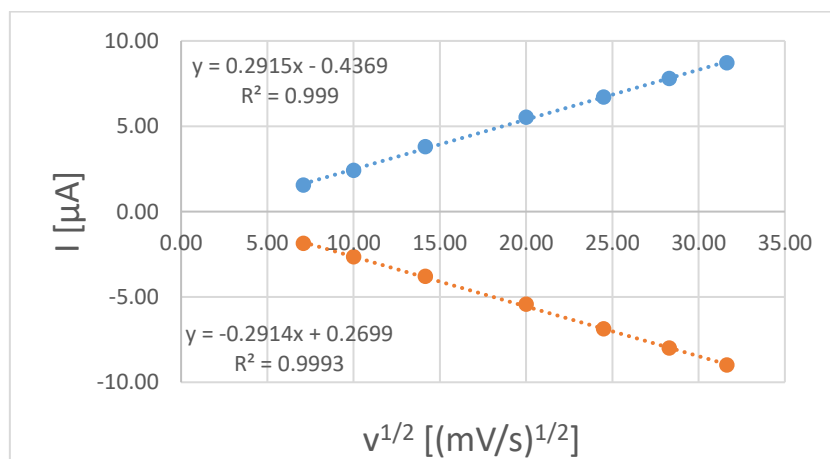

**Figure S7:** Plotted data of Randles-Sevcik-Equation Fe(ppz)<sub>3</sub> at different scan rates, second redox step

**Table S3:** Cyclovoltammetry data for Fe(ppz)<sub>3</sub> at different scan rates, third redox step

| SCANRATE                         | [MV/S] | 50    | 100   | 200   | 400   | 600   | 800   | 1000  |
|----------------------------------|--------|-------|-------|-------|-------|-------|-------|-------|
| E <sub>PC</sub>                  | [V]    | 1,126 | 1,131 | 1,123 | 1,128 | 1,128 | 1,128 | 1,126 |
| E <sub>PA</sub>                  | [V]    | 1,211 | 1,209 | 1,209 | 1,216 | 1,216 | 1,221 | 1,226 |
| E <sub>1/2</sub>                 | [V]    | 1,17  | 1,17  | 1,17  | 1,17  | 1,17  | 1,17  | 1,18  |
| ΔE                               | [V]    | 0,085 | 0,078 | 0,085 | 0,088 | 0,088 | 0,093 | 0,100 |
| I <sub>PA</sub>                  | [μA]   | -1,70 | -1,88 | -2,77 | -3,77 | -4,57 | -5,17 | -5,73 |
| I <sub>PC</sub>                  | [μA]   | 1,35  | 2,02  | 2,92  | 3,97  | 4,64  | 5,12  | 5,52  |
| I <sub>PA</sub> /I <sub>PC</sub> |        | -0,80 | -1,08 | -1,06 | -1,05 | -1,01 | -0,99 | -0,96 |

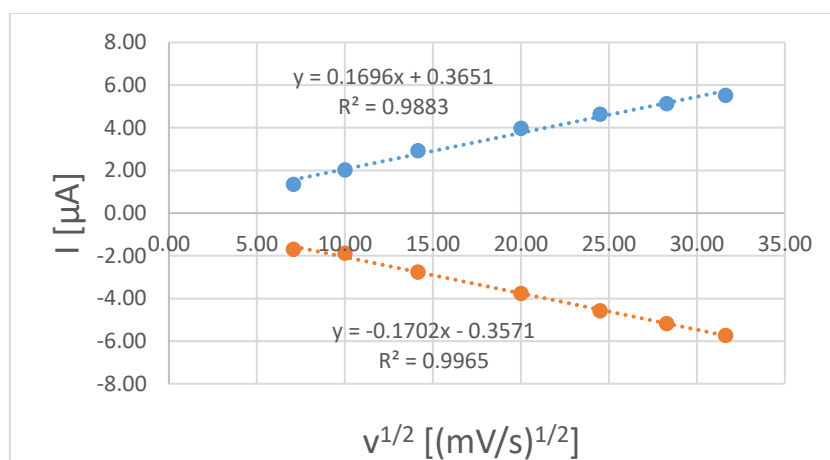

**Figure S8:** Plotted data of Randles-Sevcik-Equation Fe(ppz)<sub>3</sub> at different scan rates, third redox step

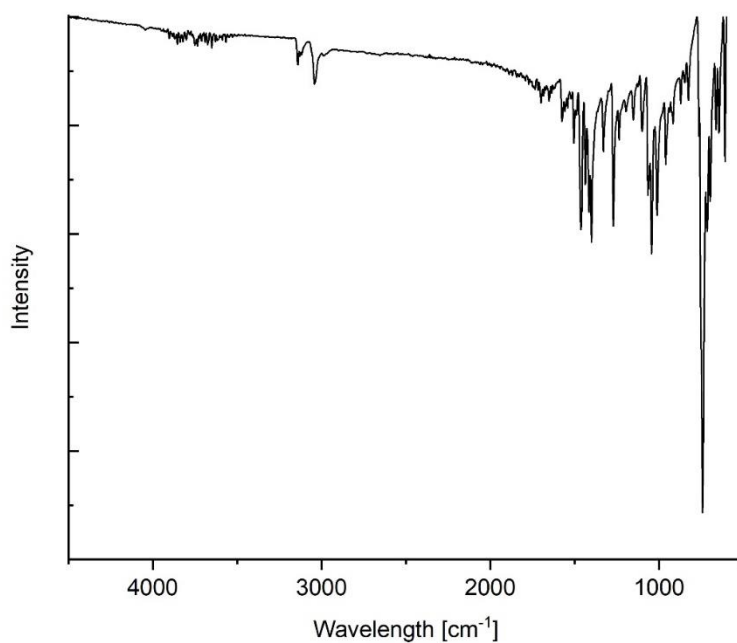

**Figure S9:** ATR-IR spectrum for complex Fe(ppz)<sub>3</sub>

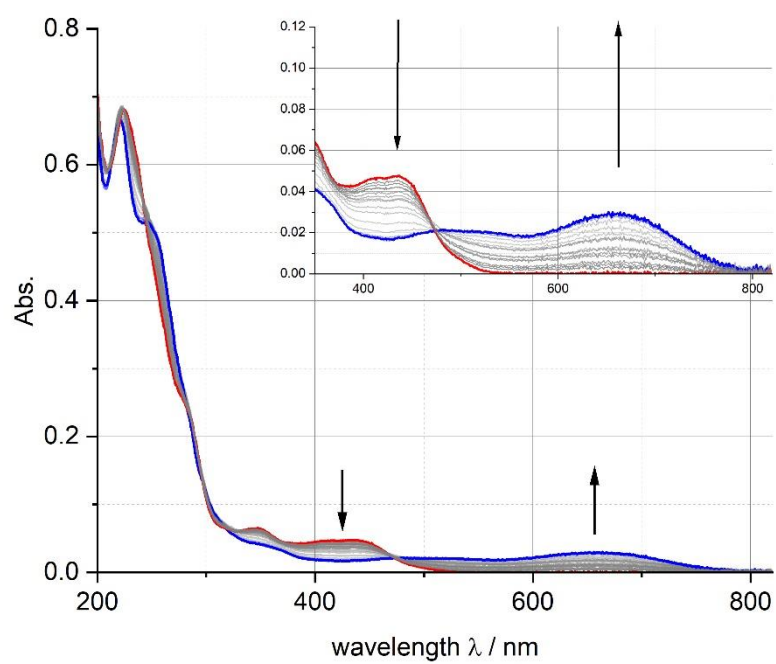

**Figure S10:** Change in the absorptive behaviour of  $\text{Fe}(\text{ppz})_3$  with an applied potential of 0.5-2 V in  $\text{CH}_3\text{CN}$

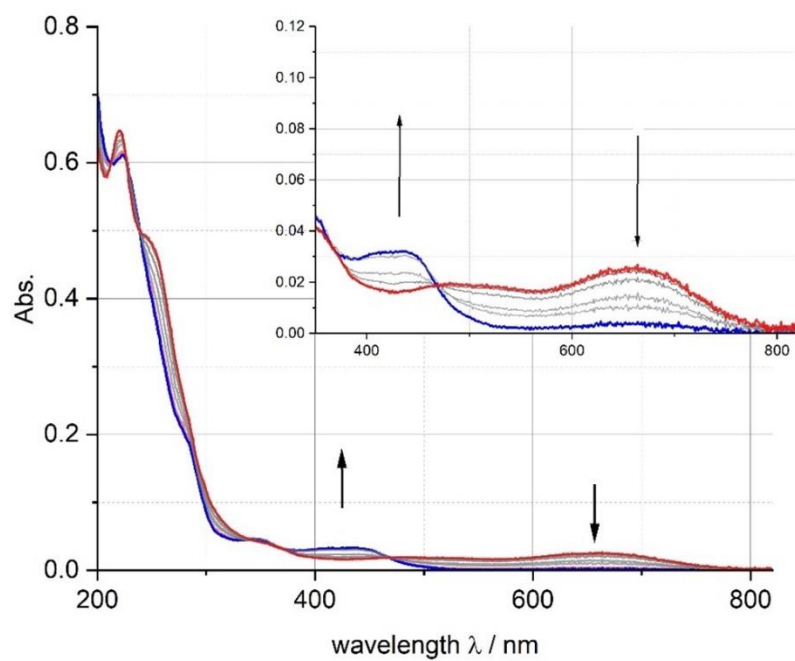

**Figure S11:** Change in the absorptive behaviour of  $\text{Fe}(\text{ppz})_3$  with an applied potential of -0.5 V in  $\text{CH}_3\text{CN}$



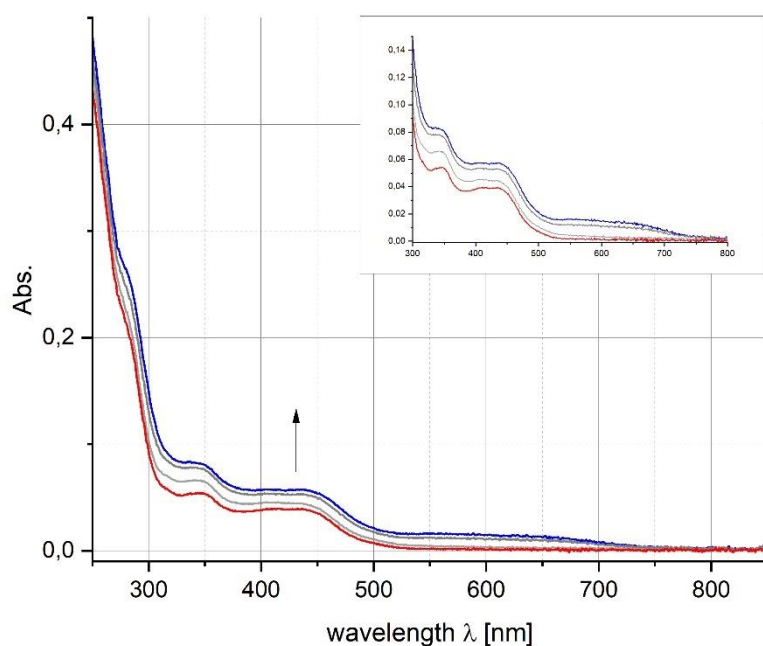

**Figure S12:** Change in the absorptive behaviour of  $\text{Fe}(\text{ppz})_3$  with an applied potential of -2.0-2.5 V in  $\text{CH}_3\text{CN}$

### $\text{Fe}(\text{bppz})_3$

The complex was obtained as red powder (3.9%).

**$^1\text{H}$ -NMR** (700 MHz,  $\text{CD}_3\text{CN}$ ):  $\delta$  = -77.61 (1s, 1H, 2-*H*) -10.18 (s, 1H, 13-*H*), -4.64 (s, 1H, 8-*H*), -3.21 (s, 1H, 12-*H*), -1.74 (s, 1H, 9-*H*), 5.39 (d,  $^3J_{\text{HH}}$  = 8.19 Hz, 2H, 5,5'-*H*), 5.75 (t,  $^3J_{\text{HH}}$  = 7.60 Hz, 2H, 6,6'-*H*), 7.10 (t,  $^3J_{\text{HH}}$  = 7.14 Hz, 1H, 6-*H*) 11.84 (s, 1H, 11-*H*) ppm. ).

**$^{13}\text{C}$ -NMR** (176.1 MHz,  $\text{CD}_3\text{CN}$ ):  $\delta$  = -79.6 (1C, 152.5 Hz, 9-*C*), -77.9 (1C, 3-*C*), 105.4 (1C, 185.7 Hz, 11-*C*), 114.4 (1C, 62.3 Hz, 12-*C*), 115.3 (2C, 89.03 Hz, 5,5'-*C*), 123.1 (1C, 162.9 Hz, 7-*C*), 130.9 (2C, 160.4 Hz, 6,6'-*C*), 131.9 (1C, 183.3 Hz, 13-*C*), 154.1 (1C, 4-*C*), 241.4 (1C, 158.8 Hz, 8-*C*), 370.5 (1C, 133.9 Hz, 2-*C*), 396.7 (1C, 10-*C*) ppm.

**$^{15}\text{N}$ -NMR** (70.96 MHz,  $\text{CD}_3\text{CN}$ ): 71.0 ppm.

**MS** (ESI in  $\text{MECN}$ ):  $m/z$  713.2150 (for  $\text{C}_{45}\text{H}_{33}\text{FeN}_6$  calc. 713.6460).

**Elemental analysis:** calc. for  $\text{C}_{45}\text{H}_{33}\text{FeN}_6$  C: 75.74%, H: 4.66%, N: 11.78%, found: C: 71.15%, H: 4.84%, N: 10.78%.

**IR** (ATR,  $\tilde{\nu}$  [ $\text{cm}^{-1}$ ]): 3108w, 3056w, 3020w, 1598w, 1564w, 1502w, 1465m, 1400m, 1373w, 1330w, 1261m, 1112w, 1064m, 1047m, 1016w, 958w, 916w, 894w, 808s, 757s, 734s, 694s, 663w, 649w, 607w.

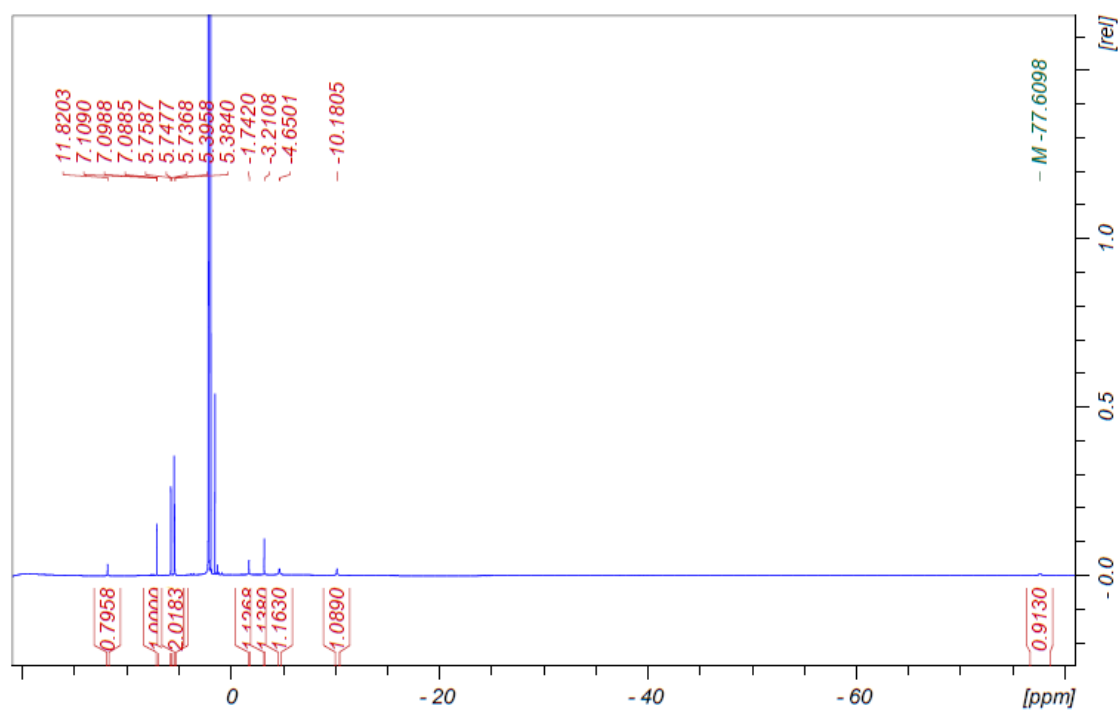

Figure S13: <sup>1</sup>H-NMR spectrum of complex Fe(bppz)<sub>3</sub> in CD<sub>3</sub>CN

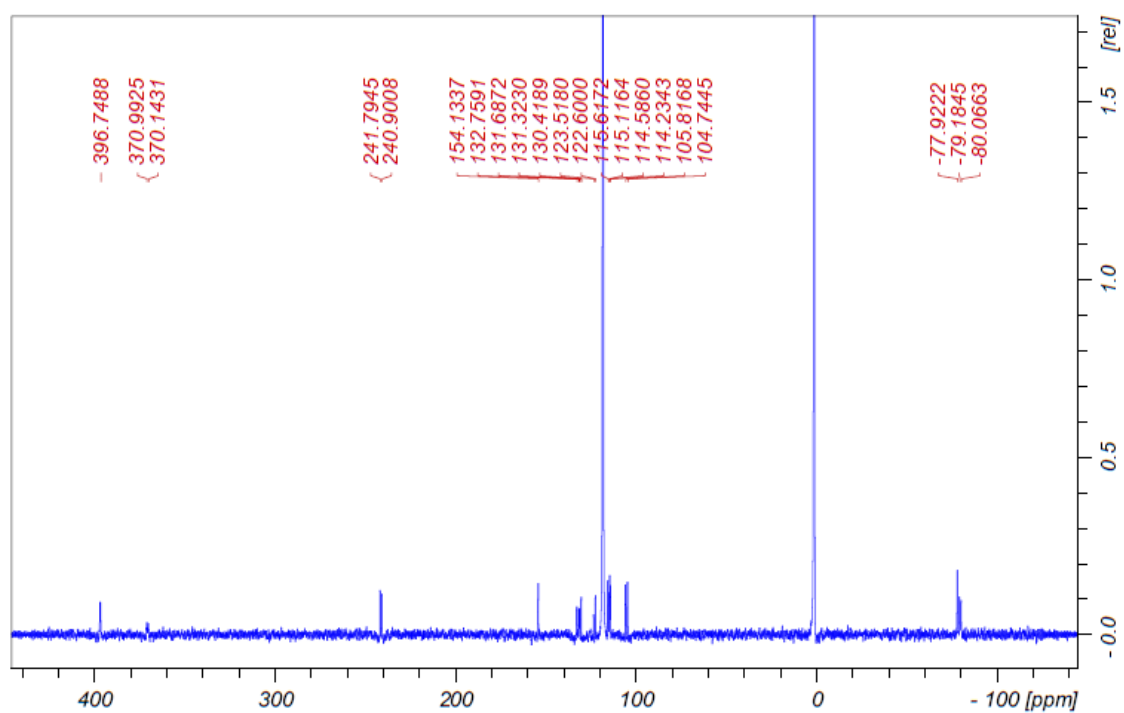

Figure S14: <sup>13</sup>C-NMR spectrum of complex Fe(bppz)<sub>3</sub> in CD<sub>3</sub>CN

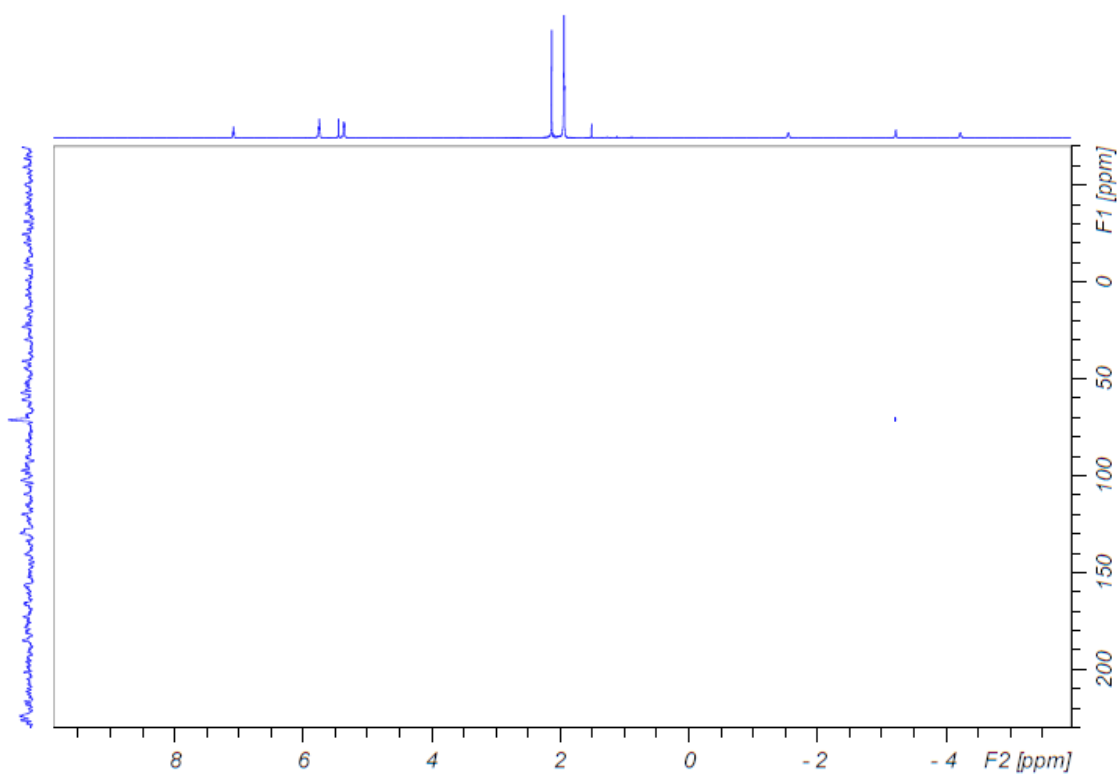

Figure S15:  $^{15}\text{N}$ -HMBC spectrum of  $\text{Fe}(\text{bppz})_3$  in  $\text{CD}_3\text{CN}$

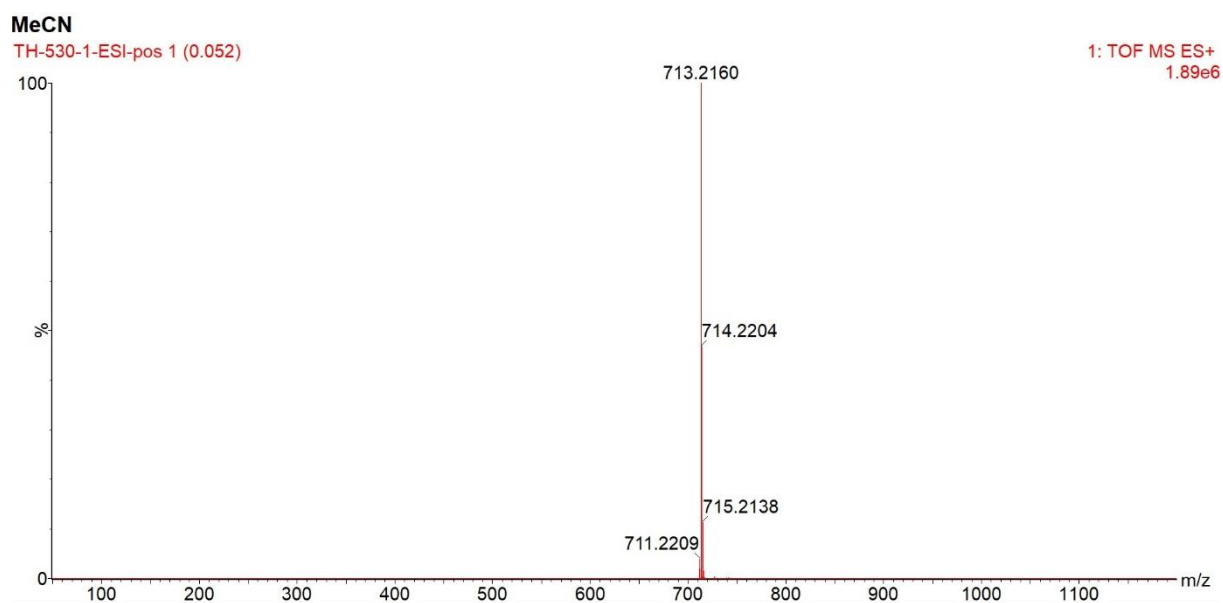

Figure S16: ESI-MS spectrum of complex  $\text{Fe}(\text{bppz})_3$  in  $\text{CH}_3\text{CN}$

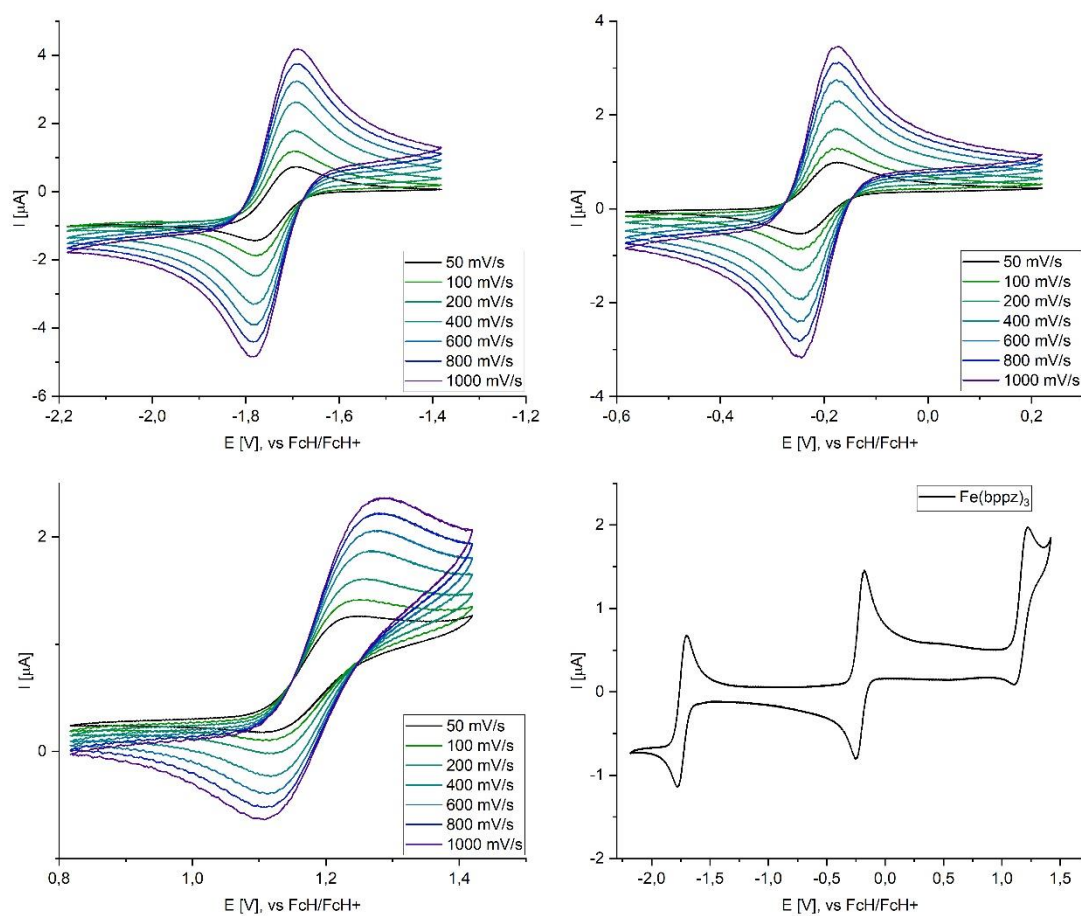

**Figure S17:** Cyclovoltammetry spectra of  $\text{Fe}(\text{bppz})_3$  in  $\text{CH}_3\text{CN}$

**Table S4:** Cyclovoltammetry data for  $\text{Fe}(\text{bppz})_3$  at different scan rates, first redox step

| SCANRATE                      | [MV/S] | 50     | 100    | 200    | 400    | 600    | 800    | 1000   |
|-------------------------------|--------|--------|--------|--------|--------|--------|--------|--------|
| $E_{\text{PC}}$               | [V]    | -1,774 | -1,777 | -1,772 | -1,777 | -1,777 | -1,779 | -1,777 |
| $E_{\text{PA}}$               | [V]    | -1,699 | -1,699 | -1,696 | -1,694 | -1,699 | -1,696 | -1,696 |
| $E_{1/2}$                     | [V]    | -1,74  | -1,74  | -1,73  | -1,74  | -1,74  | -1,74  | -1,74  |
| $\Delta E$                    | [V]    | 0,076  | 0,078  | 0,076  | 0,083  | 0,078  | 0,083  | 0,081  |
| $I_{\text{PC}}$               | [μA]   | -1,12  | -1,58  | -2,24  | -3,10  | -3,76  | -4,27  | -4,75  |
| $I_{\text{PA}}$               | [μA]   | 1,36   | 1,67   | 2,19   | 2,95   | 3,54   | 4,01   | 4,43   |
| $I_{\text{PA}}/I_{\text{PC}}$ |        | -1,21  | -1,06  | -0,98  | -0,95  | -0,94  | -0,94  | -0,93  |

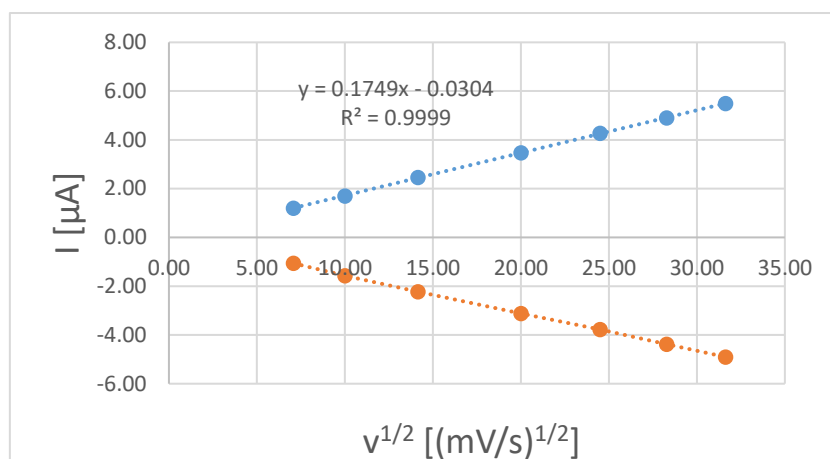

Figure S18: Plotted data of Randles-Sevcik-Equation Fe(bppz)<sub>3</sub> at different scan rates, first redox step

Table S5: Cyclic voltammetry data for Fe(bppz)<sub>3</sub> at different scan rates, second redox step

| SCANRATE        | [MV/S] | 50     | 100    | 200    | 400    | 600    | 800    | 1000   |
|-----------------|--------|--------|--------|--------|--------|--------|--------|--------|
| $E_{PC}$        | [V]    | -0,241 | -0,241 | -0,246 | -0,241 | -0,241 | -0,249 | -0,244 |
| $E_{PA}$        | [V]    | -0,175 | -0,175 | -0,180 | -0,180 | -0,175 | -0,183 | -0,173 |
| $E_{1/2}$       | [V]    | -0,21  | -0,21  | -0,21  | -0,21  | -0,21  | -0,22  | -0,21  |
| $\Delta E$      | [V]    | 0,066  | 0,066  | 0,066  | 0,061  | 0,066  | 0,066  | 0,071  |
| $I_{PC}$        | [μA]   | -0,75  | -1,09  | -1,55  | -2,18  | -2,62  | -3,04  | -3,41  |
| $I_{PA}$        | [μA]   | 0,87   | 1,14   | 1,60   | 2,21   | 2,69   | 3,08   | 3,43   |
| $I_{PA}/I_{PC}$ |        | -1,17  | -1,05  | -1,04  | -1,01  | -1,03  | -1,01  | -1,01  |

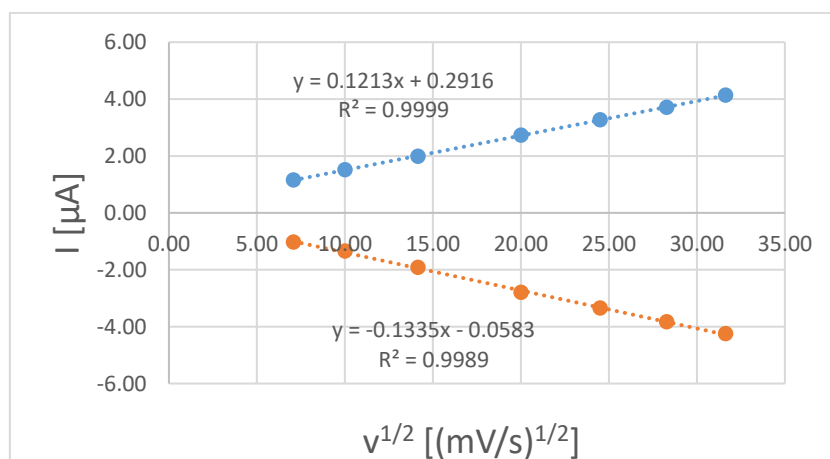

Figure S19: Plotted data of Randles-Sevcik-Equation Fe(bppz)<sub>3</sub> at different scan rates, second redox step

**Table S6:** Cyclic voltammetry data for Fe(bppz)<sub>3</sub> at different scan rates, third redox step

| SCANRATE                         | [MV/S] | 50    | 100   | 200   | 400   | 600   | 800   | 1000  |
|----------------------------------|--------|-------|-------|-------|-------|-------|-------|-------|
| E <sub>PC</sub>                  | [V]    | 1,129 | 1,127 | 1,134 | 1,132 | 1,124 | 1,122 | 1,110 |
| E <sub>PA</sub>                  | [V]    | 1,217 | 1,222 | 1,232 | 1,239 | 1,244 | 1,246 | 1,261 |
| E <sub>1/2</sub>                 | [V]    | 1,17  | 1,17  | 1,18  | 1,19  | 1,18  | 1,18  | 1,19  |
| ΔE                               | [V]    | 0,088 | 0,095 | 0,098 | 0,107 | 0,120 | 0,125 | 0,151 |
| I <sub>PC</sub>                  | [μA]   | -0,49 | -0,58 | -0,71 | -0,95 | -1,21 | -1,33 | -1,44 |
| I <sub>PA</sub>                  | [μA]   | 0,53  | 0,64  | 0,76  | 0,88  | 1,02  | 1,08  | 1,13  |
| I <sub>PA</sub> /I <sub>PC</sub> |        | -1,08 | -1,10 | -1,07 | -0,92 | -0,84 | -0,82 | -0,78 |

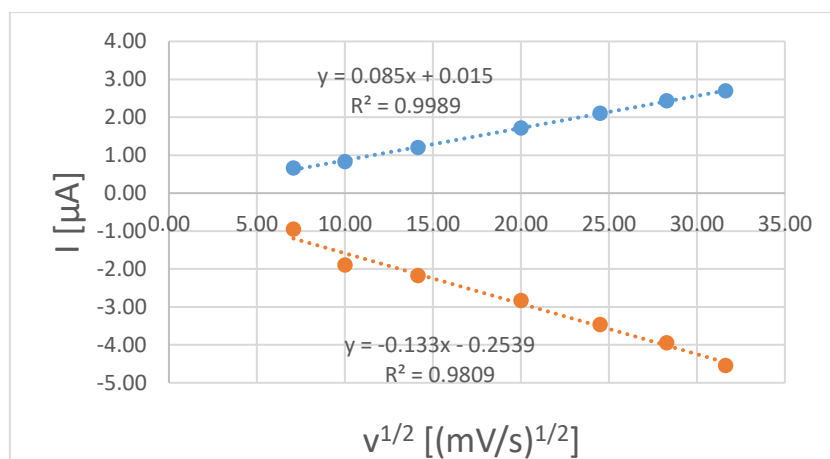

**Figure S20:** Plotted data of Randles-Sevcik-Equation Fe(bppz)<sub>3</sub> at different scan rates, third redox step

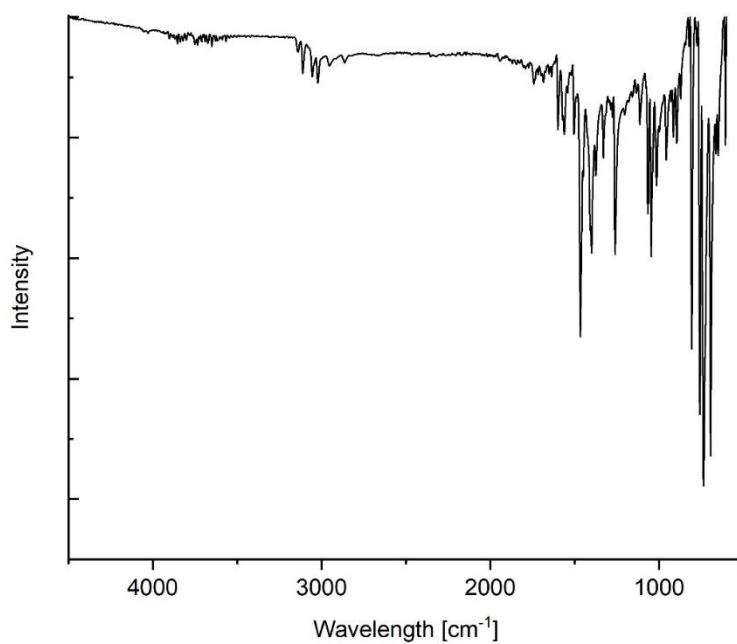

**Figure S21:** ATR-IR- spectrum of complex Fe(bppz)<sub>3</sub>

### Fe(CF<sub>3</sub>ppz)<sub>3</sub>

The complex was obtained as yellow powder (17.2%).

**<sup>1</sup>H-NMR** (700.0 MHz, CD<sub>3</sub>CN): δ = -75.17 (s, 1H, 2-*H*), -10.47 (s, 1H, 10-*H*), -3.39 (s, 1H, 9-*H*), -3.17 (s, 1H, 5-*H*), 0.27 (s, 1H, 6-*H*), 11.23 (s, 1H, 8-*H*) ppm.

**<sup>13</sup>C-NMR** (176.1 MHz, CD<sub>3</sub>CN): δ = -93.4 (1C, 3-*C*), -68.6 (1C, 6-*C*), 108.9 (1C, 8-*C*), 112.6 (1C, 9-*C*), 126.5 (1C, dd, <sup>1</sup>J<sub>CF</sub> = 272.85 Hz 275.09 Hz, 4-*C*), 132.8 (1C, 10-*C*), 229.9 (1C, 5-*C*), 361.9 (1C, 2-*C*), 382.0 (1C, 7-*C*) ppm.

**<sup>15</sup>N-NMR** (70.96 MHz, CD<sub>3</sub>CN): 84.0 ppm.

**<sup>19</sup>F-NMR** (659.0 MHz, CD<sub>3</sub>CN): δ = -71.5 (s, 3F) ppm.

**MS** (ESI in MECN): m/z 689.0800 (for C<sub>30</sub>H<sub>18</sub>F<sub>9</sub>FeN<sub>6</sub> calc. 689.0799).

**Elemental analysis:** calc. for C<sub>30</sub>H<sub>18</sub>F<sub>9</sub>FeN<sub>6</sub>: C: 52.27%, H: 2.63%, N: 12.19%, found: C: 51.90%, H: 2.81%, N: 12.12%.

**IR** (ATR,  $\tilde{\nu}$  [cm<sup>-1</sup>]): 3155w, 3033w, 2360w, 2335w, 1585w, 1508w, 1477w, 1396m, 1315s, 1272s, 1249m, 1159m, 1110s, 1066s, 1045s, 960m, 900m, 838w, 821w, 804m, 746s, 702m, 661m, 607w.

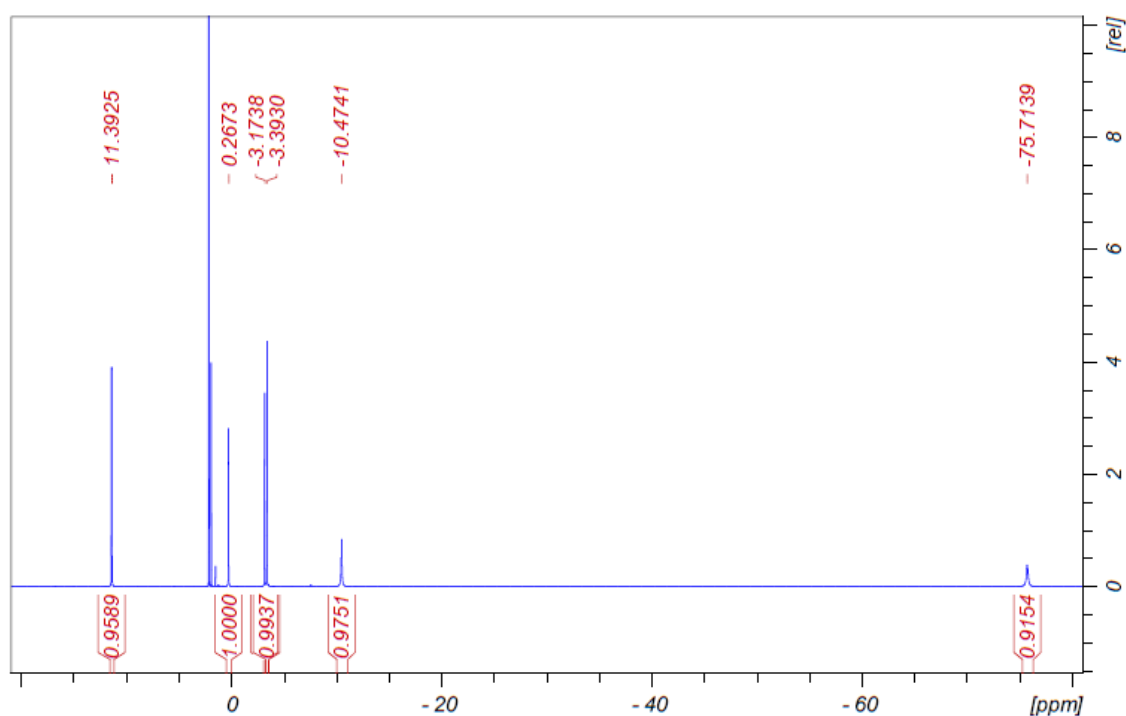

Figure S22: <sup>1</sup>H-NMR spectra of complex Fe(CF<sub>3</sub>ppz)<sub>3</sub> in CD<sub>3</sub>CN

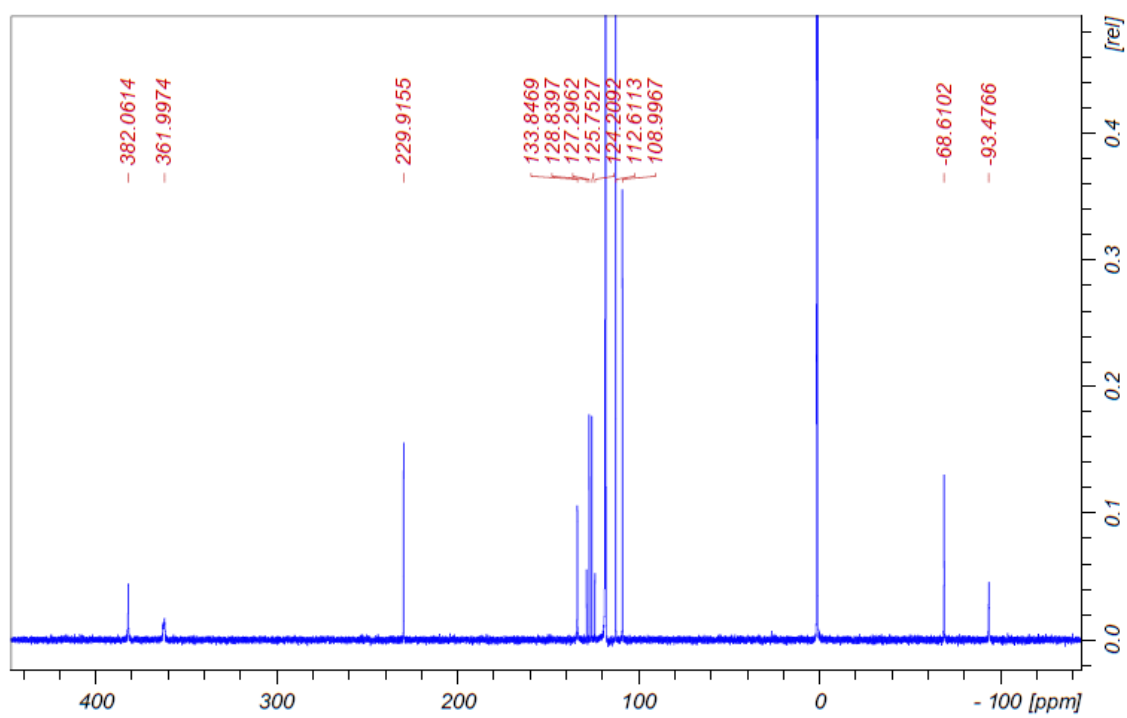

Figure S23: <sup>13</sup>C-NMR spectra of complex  $\text{Fe}(\text{CF}_3\text{ppz})_3$  in  $\text{CD}_3\text{CN}$

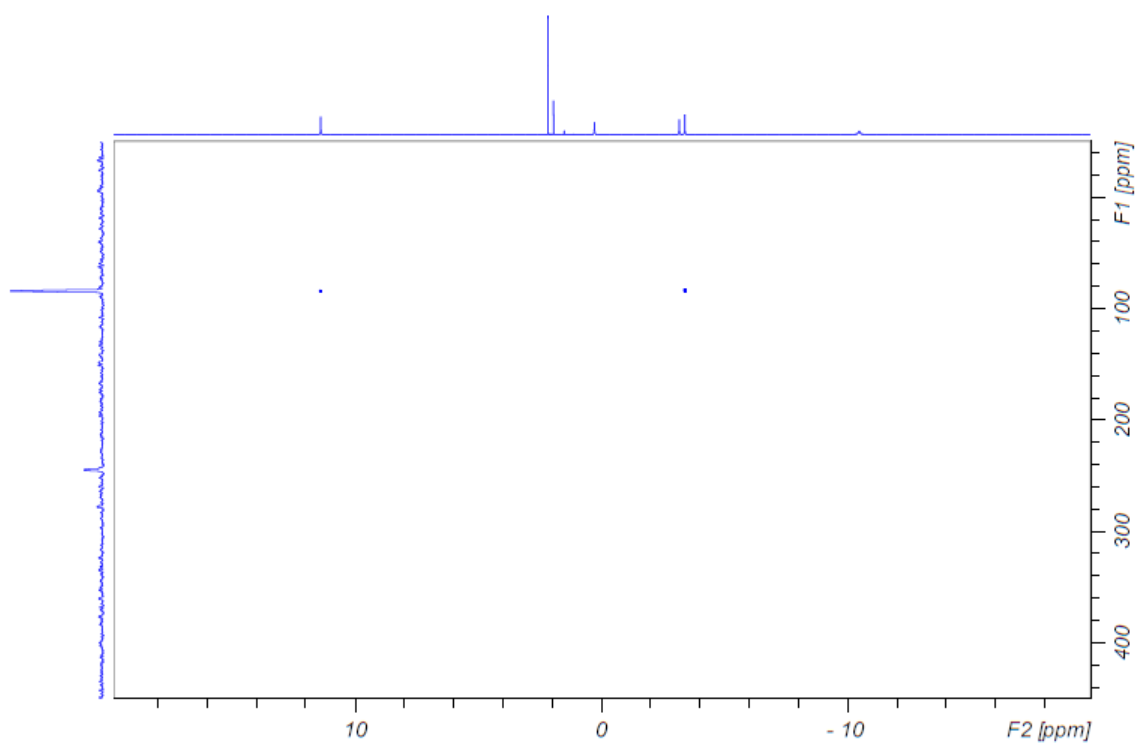

Figure S24: <sup>15</sup>N-HMBC spectrum of the complex  $\text{Fe}(\text{CF}_3\text{ppz})_3$  in  $\text{CD}_3\text{CN}$



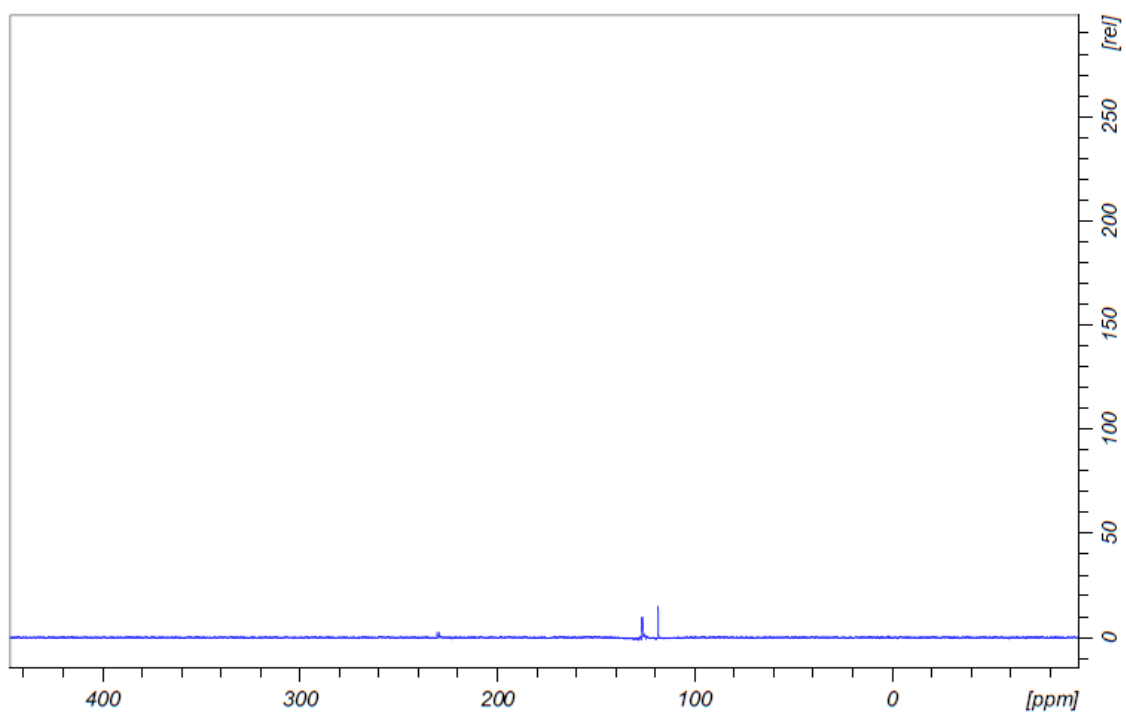

Figure S25: <sup>19</sup>F-HMBC spectrum of the complex  $\text{Fe}(\text{CF}_3\text{ppz})_3$  in  $\text{CD}_3\text{CN}$

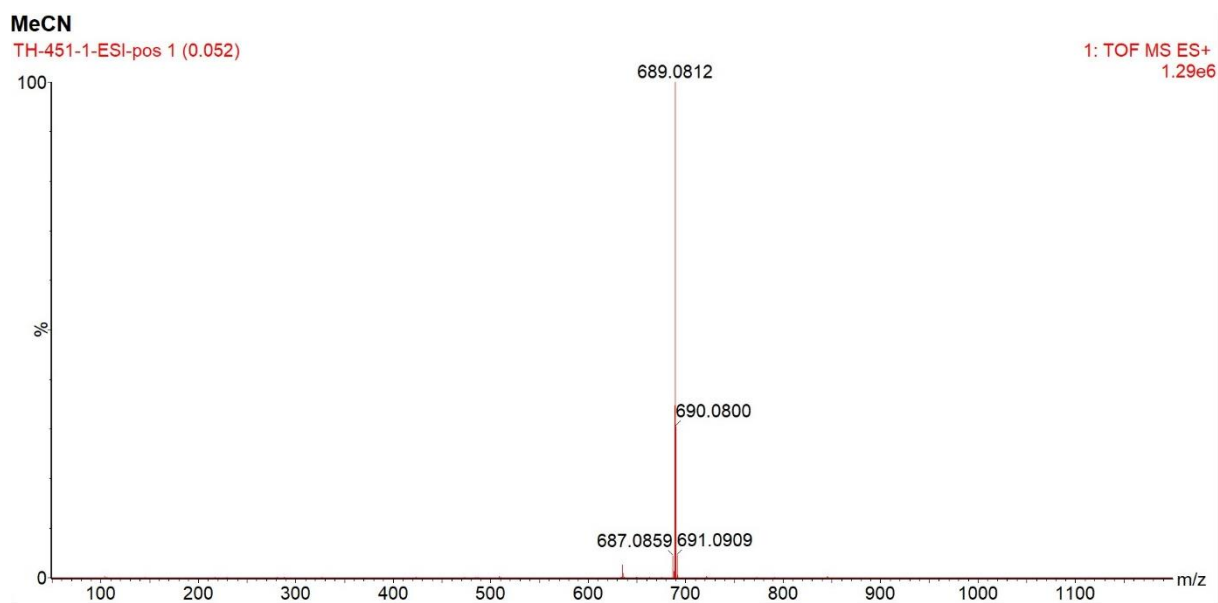

Figure S26: ESI-MS of complex  $\text{Fe}(\text{CF}_3\text{ppz})_3$  in  $\text{CH}_3\text{CN}$

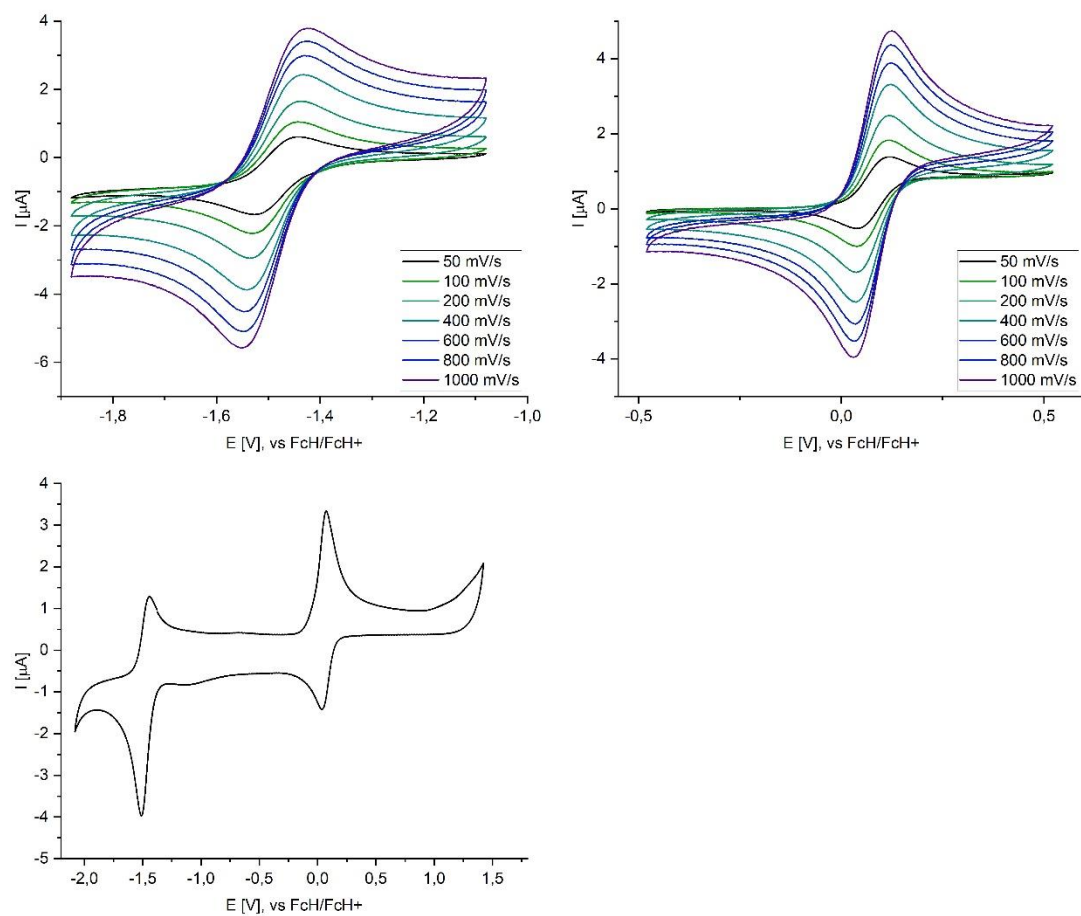

**Figure S27:** Cyclic voltammetry spectra of  $\text{Fe}(\text{CF}_3\text{ppz})_3$  in  $\text{CH}_3\text{CN}$

**Table S7:** Cyclic voltammetry data for  $\text{Fe}(\text{CF}_3\text{ppz})_3$  at different scan rates, first redox step

| SCANRATE                      | [MV/S]            | 50     | 100    | 200    | 400    | 600    | 800    | 1000   |
|-------------------------------|-------------------|--------|--------|--------|--------|--------|--------|--------|
| $E_{\text{PC}}$               | [V]               | -1,522 | -1,524 | -1,531 | -1,539 | -1,541 | -1,544 | -1,541 |
| $E_{\text{PA}}$               | [V]               | -1,448 | -1,443 | -1,441 | -1,439 | -1,436 | -1,439 | -1,434 |
| $E_{1/2}$                     | [V]               | -1,48  | -1,48  | -1,49  | -1,49  | -1,49  | -1,49  | -1,49  |
| $\Delta E$                    | [V]               | 0,073  | 0,081  | 0,090  | 0,100  | 0,105  | 0,105  | 0,107  |
| $I_{\text{PC}}$               | [ $\mu\text{A}$ ] | -1,13  | -1,59  | -2,25  | -2,99  | -3,50  | -3,95  | -4,24  |
| $I_{\text{PA}}$               | [ $\mu\text{A}$ ] | 1,10   | 1,48   | 2,02   | 2,63   | 3,03   | 3,35   | 3,63   |
| $I_{\text{PA}}/I_{\text{PC}}$ |                   | -0,97  | -0,93  | -0,90  | -0,88  | -0,86  | -0,85  | -0,86  |

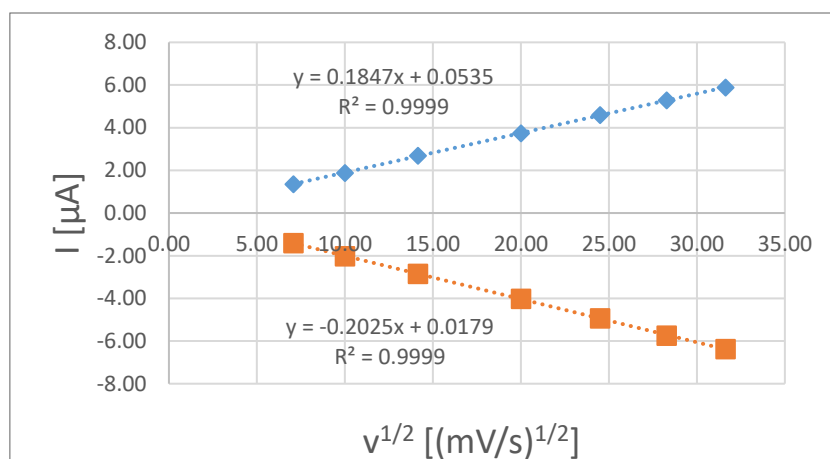

Figure S28: Plotted data of Randles-Sevcik-Equation Fe(CF<sub>3</sub>ppz)<sub>3</sub> at different scan rates, first redox step

Table S8: Cyclovoltammetry data for Fe(CF<sub>3</sub>ppz)<sub>3</sub> at different scan rates, second redox step

| SCANRATE                         | [MV/S] | 50    | 100   | 200   | 400   | 600   | 800   | 1000  |
|----------------------------------|--------|-------|-------|-------|-------|-------|-------|-------|
| E <sub>PC</sub>                  | [V]    | 0,045 | 0,040 | 0,037 | 0,037 | 0,035 | 0,037 | 0,033 |
| E <sub>PA</sub>                  | [V]    | 0,113 | 0,113 | 0,118 | 0,120 | 0,123 | 0,118 | 0,118 |
| E <sub>1/2</sub>                 | [V]    | 0,08  | 0,08  | 0,08  | 0,08  | 0,08  | 0,08  | 0,08  |
| ΔE                               | [V]    | 0,068 | 0,073 | 0,081 | 0,083 | 0,088 | 0,081 | 0,085 |
| I <sub>PC</sub>                  | [μA]   | -1,11 | -1,55 | -2,22 | -3,02 | -3,63 | -4,11 | -4,54 |
| I <sub>PA</sub>                  | [μA]   | 1,03  | 1,47  | 2,04  | 2,79  | 3,33  | 3,77  | 4,13  |
| I <sub>PA</sub> /I <sub>PC</sub> |        | -0,93 | -0,95 | -0,92 | -0,92 | -0,92 | -0,92 | -0,91 |

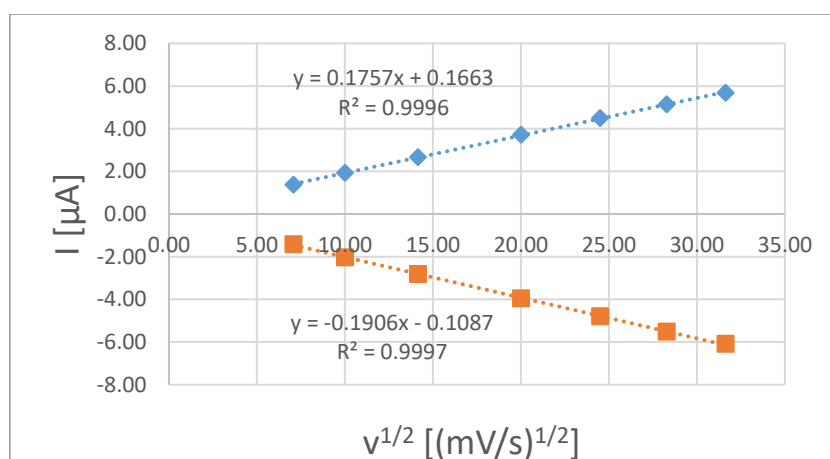

Figure 29: Plotted data of Randles-Sevcik-Equation Fe(CF<sub>3</sub>ppz)<sub>3</sub> at different scan rates, first redox step

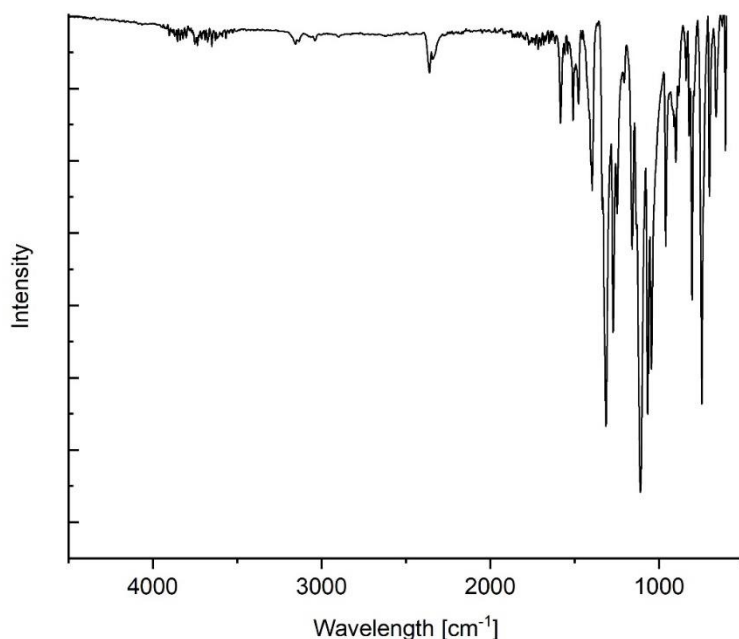

Figure S30: ATR-IR-spectrum of complex  $\text{Fe}(\text{CF}_3\text{ppz})_3$

### $\text{Fe}(\text{naphpz})_3$

The complex was obtained as red powder (5.3%).

**$^1\text{H-NMR}$**  (700 MHz,  $\text{DMSO-d}_6$ ):  $\delta$  = -85.19 (s, 1H, 2-*H*), -12.51 (s, 1H, 13-*H*), -1.68 (d,  $^3J_{\text{HH}}$  = 6.3 Hz, 1H, 4-*H*), -1.31 (s, 1H, 12-*H*), 1.10 (s, 1H, 9-*H*), 1.25 (t,  $^3J_{\text{HH}}$  = 7.10 Hz, 1H, 6-*H*), 8.12 (t,  $^3J_{\text{HH}}$  = 6.30 Hz, 1H, 5-*H*), 11.15 (s, 1H, 11-*H*), 12.83 (d,  $^3J_{\text{HH}}$  = 8.50 Hz, 1H, 7-*H*) ppm.

**$^{13}\text{C-NMR}^*$**  (176.1 MHz,  $\text{DMSO-d}_6$ ):  $\delta$  = -97.6 (1C, 3-C), -56.79 (1C, 150.66 Hz, 9-C), 80.3 (1C, 150.66 Hz, 7-C), 81.6 (1C, 160.34 Hz, 5-C), 99.4 (1C, 180.91 Hz, 12-C), 124.3 (2C, 188.74 Hz, 11-C), 126.6 (1C, 188.74 Hz, 13-C), 172.1 (2C, 157.98 Hz, 6-C), 180.5 (1C, 157.98 Hz, 4-C), 216.3 (1C, 8-C), 365.3 (1C, 2-C), 413.9 (1C, 10-C) ppm.

**MS** (ESI in  $\text{MECN}$ ):  $m/z$  635.1640 (for  $\text{C}_{39}\text{H}_{27}\text{FeN}_6$  calc. 635.1647).

**Elemental analysis:** calc. for  $\text{C}_{39}\text{H}_{27}\text{FeN}_6$ : C: 73.71%, H: 4.28%, N: 13.22%, found: C: 74.29%, H: 5.10%, N: 12.42%. **IR** (ATR,  $\tilde{\nu}$  [ $\text{cm}^{-1}$ ]): 3126w, 6047w, 2917w, 2854w, 1585w, 1593w, 1560w, 1510w, 1486w,

1459m, 1405m, 1332w, 1313w, 1251w, 1197w, 1134w, 1107w, 1062m, 1037w, 977w, 935w, 889w, 856m, 831w, 736s, 682w, 651w.

\*not decoupled

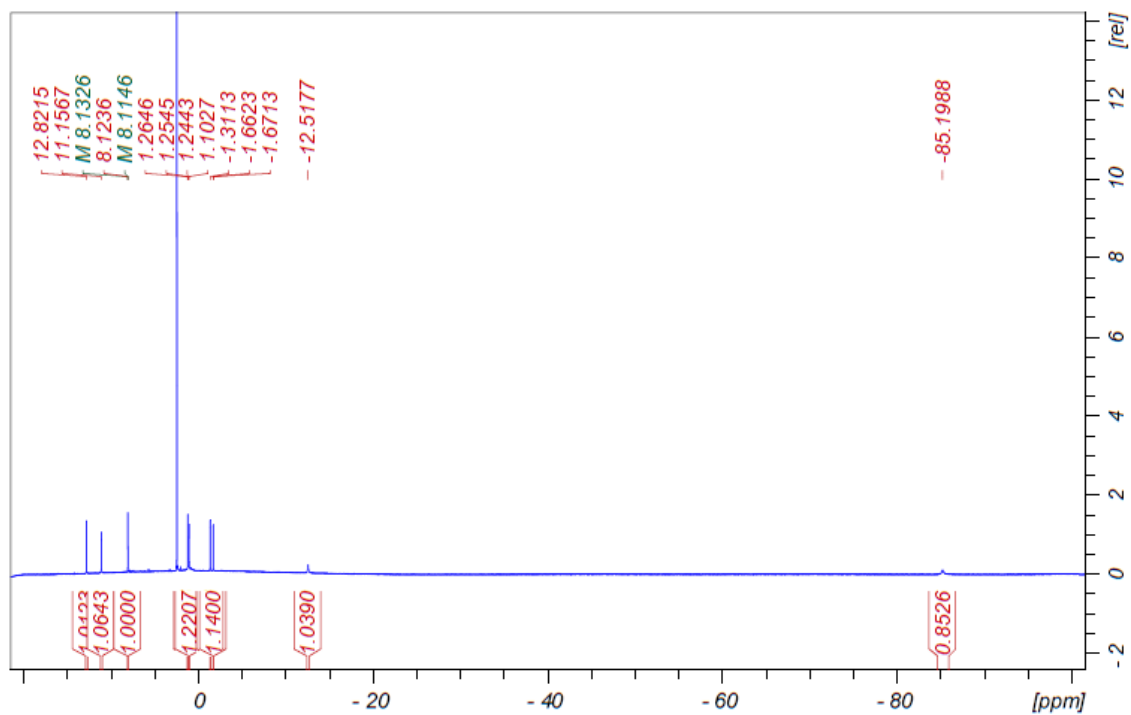

Figure S31: <sup>1</sup>H-NMR spectrum of complex Fe(naphpz)<sub>3</sub> in DMSO-d<sub>6</sub>

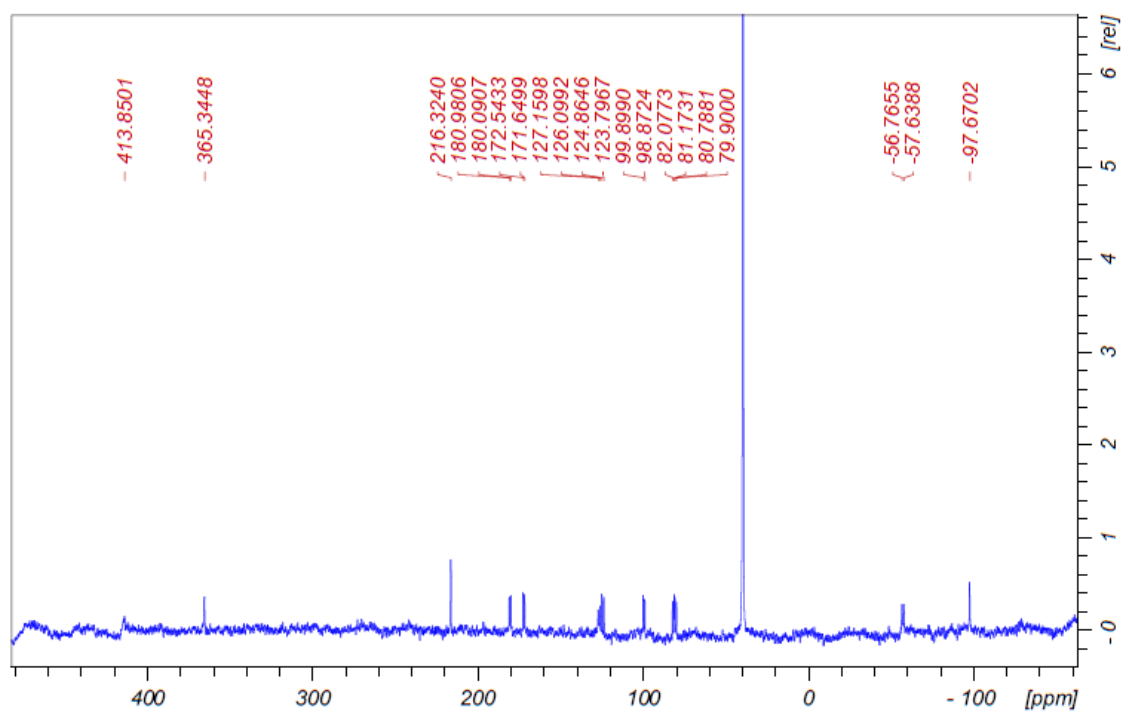

Figure S32: <sup>13</sup>C-NMR spectrum of complex Fe(naphpz)<sub>3</sub> in DMSO-d<sub>6</sub>

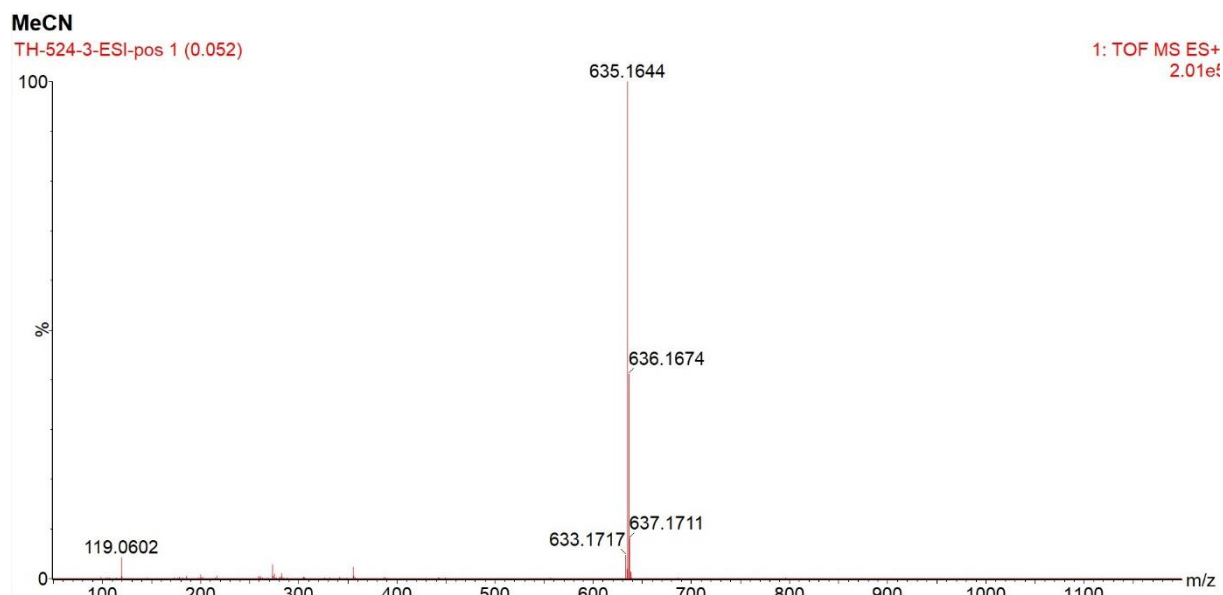

Figure S33: ESI-MS spectrum of complex  $\text{Fe}(\text{naphpz})_3$  in  $\text{CH}_3\text{CN}$

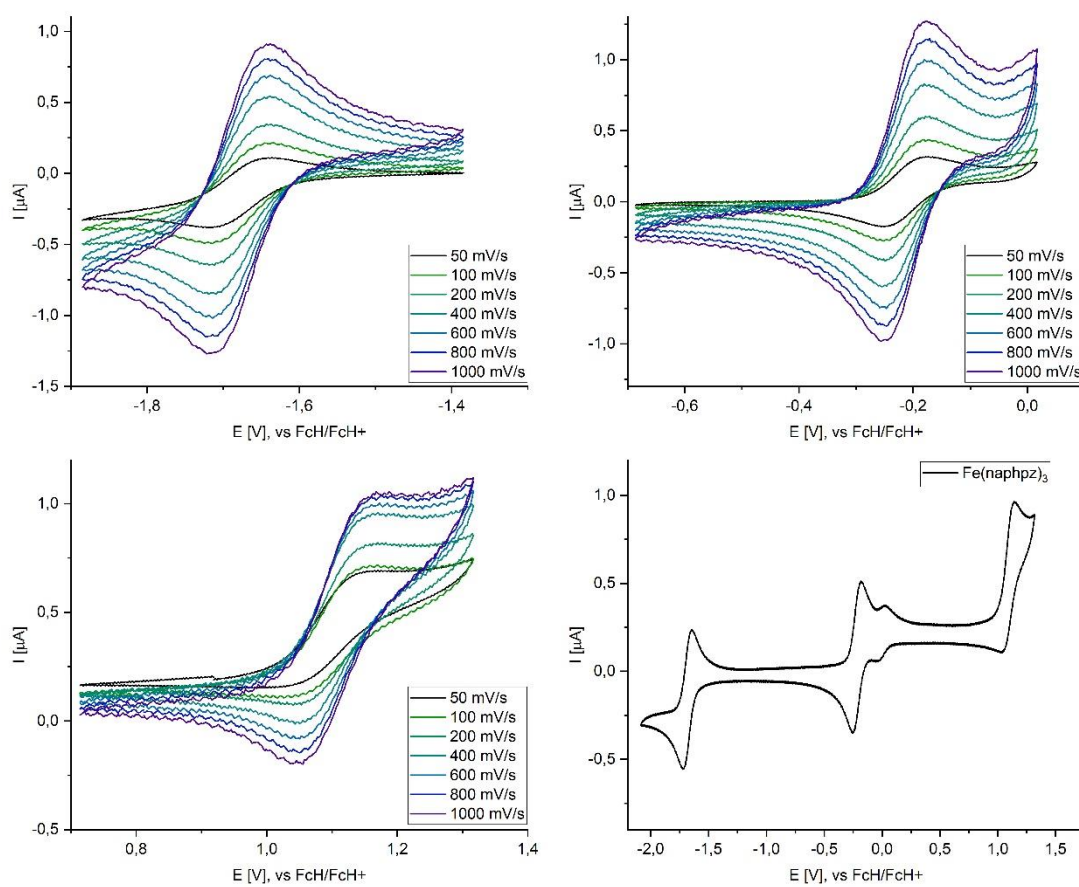

Figure S34: Cyclic voltammetry spectra of complex  $\text{Fe}(\text{naphpz})_3$  in  $\text{CH}_3\text{CN}$

Table S9: Cyclic voltammetry data for Fe(naphpz)<sub>3</sub> at different scan rates, first redox step

| SCANRATE                         | [MV/S] | 50     | 100    | 200    | 400    | 600    | 800    | 1000   |
|----------------------------------|--------|--------|--------|--------|--------|--------|--------|--------|
| E <sub>PC</sub>                  | [V]    | -1,712 | -1,712 | -1,712 | -1,717 | -1,714 | -1,709 | -1,714 |
| E <sub>PA</sub>                  | [V]    | -1,638 | -1,641 | -1,648 | -1,643 | -1,648 | -1,648 | -1,643 |
| E <sub>1/2</sub>                 | [V]    | -1,68  | -1,68  | -1,68  | -1,68  | -1,68  | -1,68  | -1,68  |
| ΔE                               | [V]    | 0,073  | 0,071  | 0,064  | 0,073  | 0,066  | 0,061  | 0,071  |
| I <sub>PC</sub>                  | [μA]   | -0,18  | -0,21  | -0,39  | -0,53  | -0,59  | -0,77  | -0,81  |
| I <sub>PA</sub>                  | [μA]   | 0,18   | 0,25   | 0,37   | 0,56   | 0,62   | 0,75   | 0,88   |
| I <sub>PA</sub> /I <sub>PC</sub> |        | -1,02  | -1,18  | -0,95  | -1,05  | -1,04  | -0,98  | -1,08  |

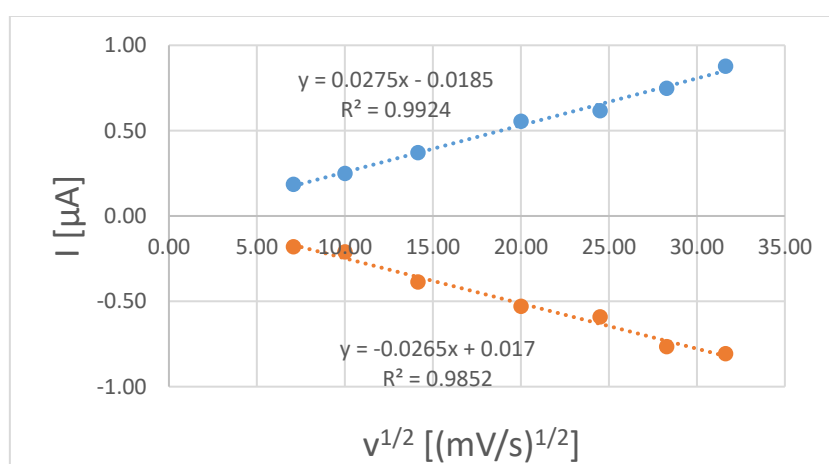

Figure S35: Plotted data of Randles-Sevcik-Equation Fe(naphpz)<sub>3</sub> at different scan rates, first redox step

Table S10: Cyclic voltammetry data for Fe(naphpz)<sub>3</sub> at different scan rates, second redox step

| SCANRATE                         | [MV/S] | 50     | 100    | 200    | 400    | 600    | 800    | 1000   |
|----------------------------------|--------|--------|--------|--------|--------|--------|--------|--------|
| E <sub>PC</sub>                  | [V]    | -0,248 | -0,251 | -0,246 | -0,251 | -0,257 | -0,243 | -0,253 |
| E <sub>PA</sub>                  | [V]    | -0,177 | -0,182 | -0,182 | -0,192 | -0,191 | -0,190 | -0,185 |
| E <sub>1/2</sub>                 | [V]    | -0,21  | -0,22  | -0,21  | -0,22  | -0,22  | -0,22  | -0,22  |
| ΔE                               | [V]    | 0,071  | 0,068  | 0,063  | 0,059  | 0,066  | 0,054  | 0,068  |
| I <sub>PC</sub>                  | [μA]   | -0,15  | -0,22  | -0,35  | -0,65  | -0,83  | -0,71  | -0,79  |
| I <sub>PA</sub>                  | [μA]   | 0,17   | 0,19   | 0,32   | 0,52   | 0,65   | 0,55   | 0,60   |
| I <sub>PA</sub> /I <sub>PC</sub> |        | -1,10  | -0,86  | -0,91  | -0,80  | -0,79  | -0,76  | -0,76  |

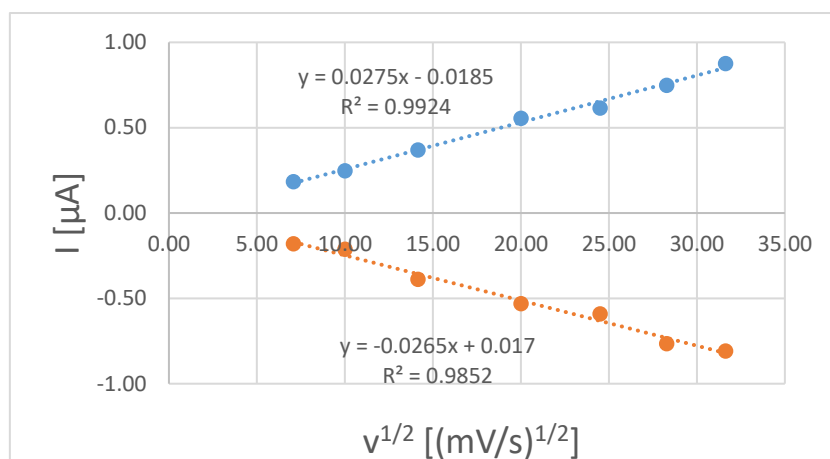

Figure S36: Plotted data of Randles-Sevcik-Equation Fe(naphpz)<sub>3</sub> at different scan rates, second redox step

Table S11: Cyclovoltammetry data for Fe(naphpz)<sub>3</sub> at different scan rates, second redox step

| SCANRATE                         | [MV/S] | 50    | 100   | 200   | 400   | 600   | 800   | 1000  |
|----------------------------------|--------|-------|-------|-------|-------|-------|-------|-------|
| E <sub>PC</sub>                  | [V]    | 1,037 | 1,035 | 1,057 | 1,049 | 1,057 | 1,059 | 1,062 |
| E <sub>PA</sub>                  | [V]    | 1,125 | 1,130 | 1,127 | 1,140 | 1,130 | 1,127 | 1,125 |
| E <sub>1/2</sub>                 | [V]    | 1,08  | 1,08  | 1,09  | 1,09  | 1,09  | 1,09  | 1,09  |
| ΔE                               | [V]    | 0,088 | 0,095 | 0,071 | 0,090 | 0,073 | 0,068 | 0,063 |
| I <sub>PC</sub>                  | [μA]   | -0,18 | -0,30 | -0,37 | -0,44 | -0,51 | -0,54 | -0,61 |
| I <sub>PA</sub>                  | [μA]   | 0,20  | 0,25  | 0,35  | 0,43  | 0,46  | 0,50  | 0,52  |
| I <sub>PA</sub> /I <sub>PC</sub> |        | -1,07 | -0,84 | -0,94 | -0,98 | -0,90 | -0,92 | -0,86 |

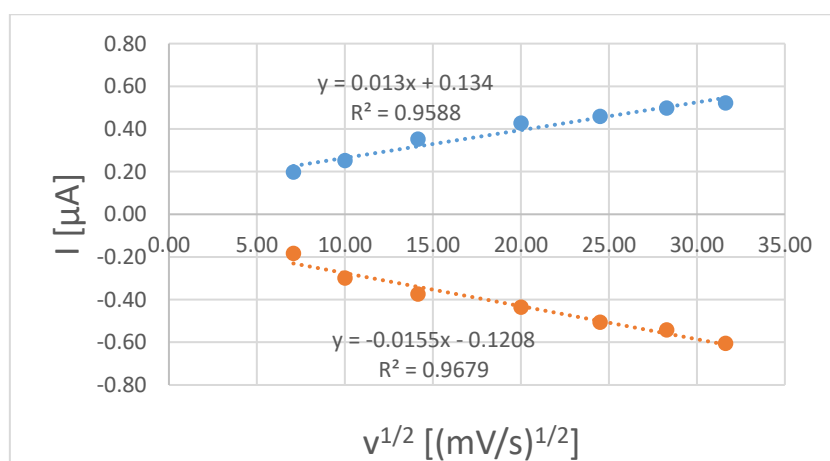

Figure S37: Plotted data of Randles-Sevcik-Equation Fe(naphpz)<sub>3</sub> at different scan rates, first redox step



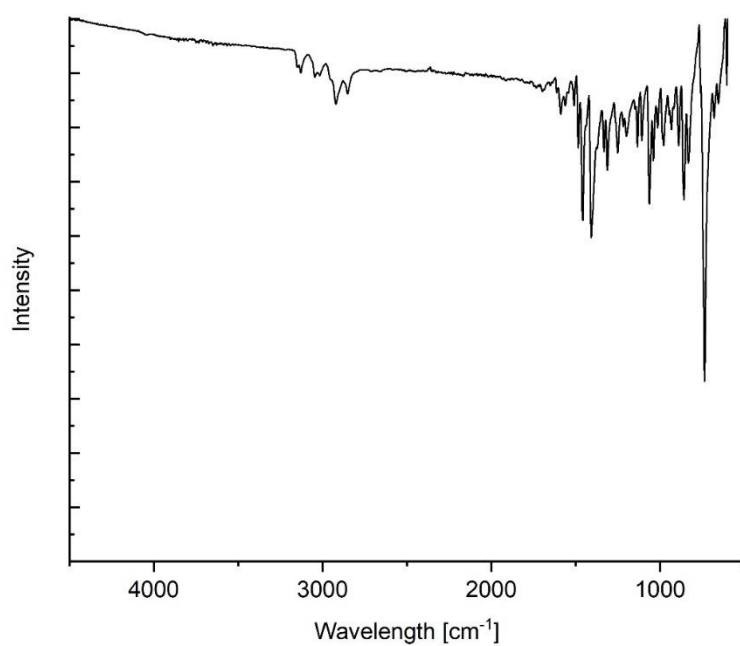

**Figure S38:** ATR-IR-spectrum of complex  $\text{Fe}(\text{naphpz})_3$  in  $\text{CH}_3\text{CN}$

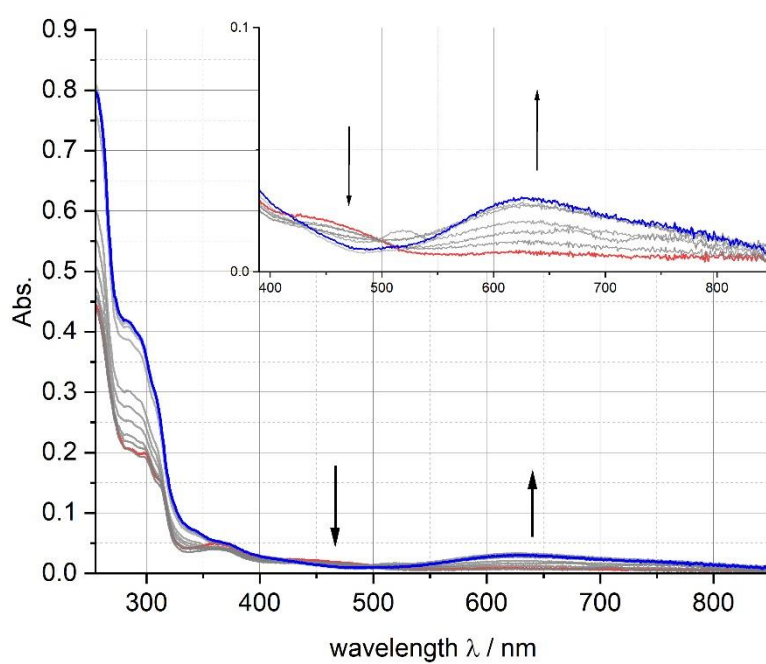

**Figure S39:** Change in the absorptive behaviour of  $(\text{Fe}(\text{naphpz})_3)$  with an applied potential of 0.8-2 V in  $\text{CH}_3\text{CN}$

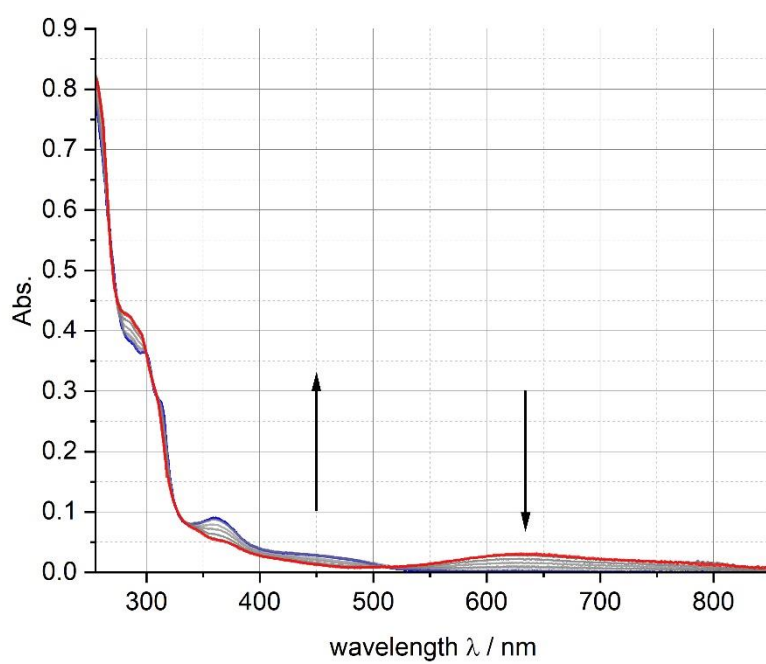

**Figure S40:** Change in the absorptive behaviour of  $(\text{Fe}(\text{naphpz})_3)$  with an applied potential of -0.5-(-1.5) V in  $\text{CH}_3\text{CN}$

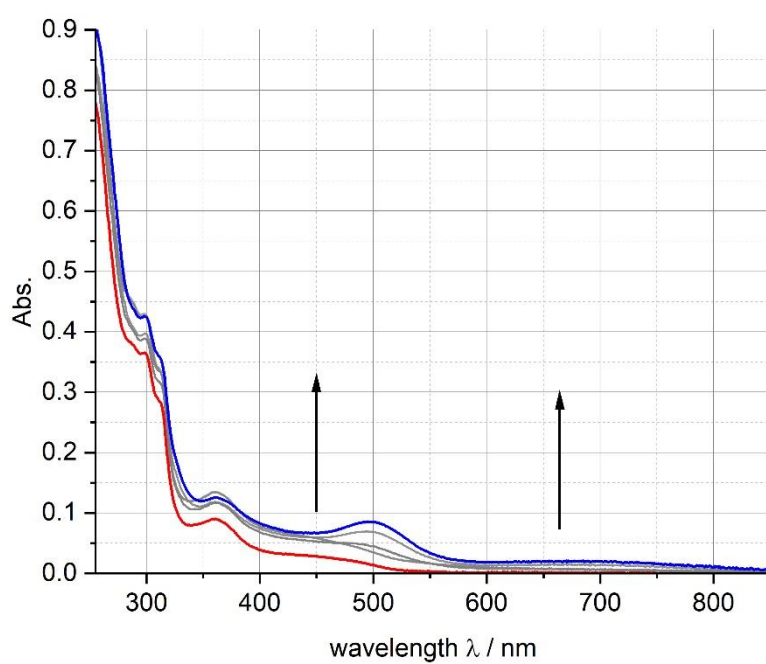

**Figure S41:** Change in the absorptive behaviour of  $(\text{Fe}(\text{naphpz})_3)$  with an applied potential of -2.5 V in  $\text{CH}_3\text{CN}$

### Fe(MeOppz)<sub>3</sub>

The complex was obtained as red powder (2.6%).

**<sup>1</sup>H-NMR (700 MHz, CD<sub>3</sub>CN):** δ = -79.93 (s, 1H, 2-*H*), -10.34 (s, 1H, 10-*H*), -5.36 (s, 1H, 6-*H*), -5.12 (s, 1H, 5-*H*), -3.19 (s, 1H, 9-*H*), 1.44 (s, 3H, 4-*H*), 12.06 (s, 1H, 8-*H*) ppm.

**<sup>13</sup>C-NMR\*** (176.1 MHz, CD<sub>3</sub>CN): δ = -106.1 (1C, 156.6 Hz, 6-*C*), -93.0 (1C, 3-*C*), 49.1 (1C, 139.07 Hz, 4-*C*), 103.9 (1C, 182.9 Hz, 8-*C*), 114.1 (1C, 191.7 Hz, 9-*C*) 130.1 (1C, 182.9 Hz, 10-*C*), 232.4 (1C, 159.9 Hz, 5-*C*), 360.8 (1C, 129.6 Hz, 2-*C*), 403.2 (1C, 7-*C*) ppm.

**<sup>15</sup>N-NMR** (70.96 MHz, CD<sub>3</sub>CN): 80.2 ppm.

**MS** (ESI in ME CN): *m/z* 575.1530 (for C<sub>30</sub>H<sub>27</sub>FeN<sub>6</sub>O<sub>3</sub> calc. 575.1494).

**Elemental analysis:** calc. for C<sub>30</sub>H<sub>27</sub>FeN<sub>6</sub>O<sub>3</sub>: C: 62.62%, H: 4.73%, N: 14.61%, found: C:62.49%, H: 5.19%, N: 14.35%.

**IR** (ATR,  $\tilde{\nu}$  [cm<sup>-1</sup>]): 3122w, 3039w, 3006w, 2952w, 2931w, 2902w, 2829w, 1583w, 1560s, 1506w, 1469s, 1417s, 1315m, 1276s, 1249m, 1209s, 1174s, 1116m, 1031s, 958m, 879m, 811w, 784s, 744s, 661w, 621m, 609m.

\*not decoupled

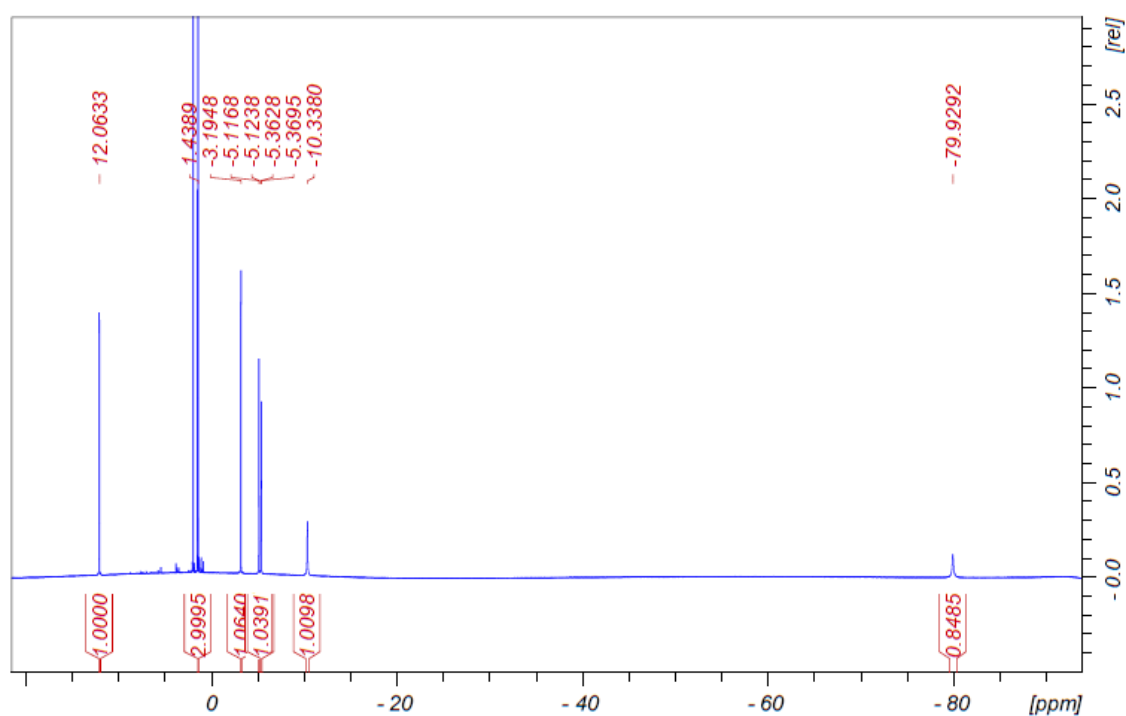

Figure S42: <sup>1</sup>H-NMR spectrum of complex Fe(MeOppz)<sub>3</sub> in CD<sub>3</sub>CN

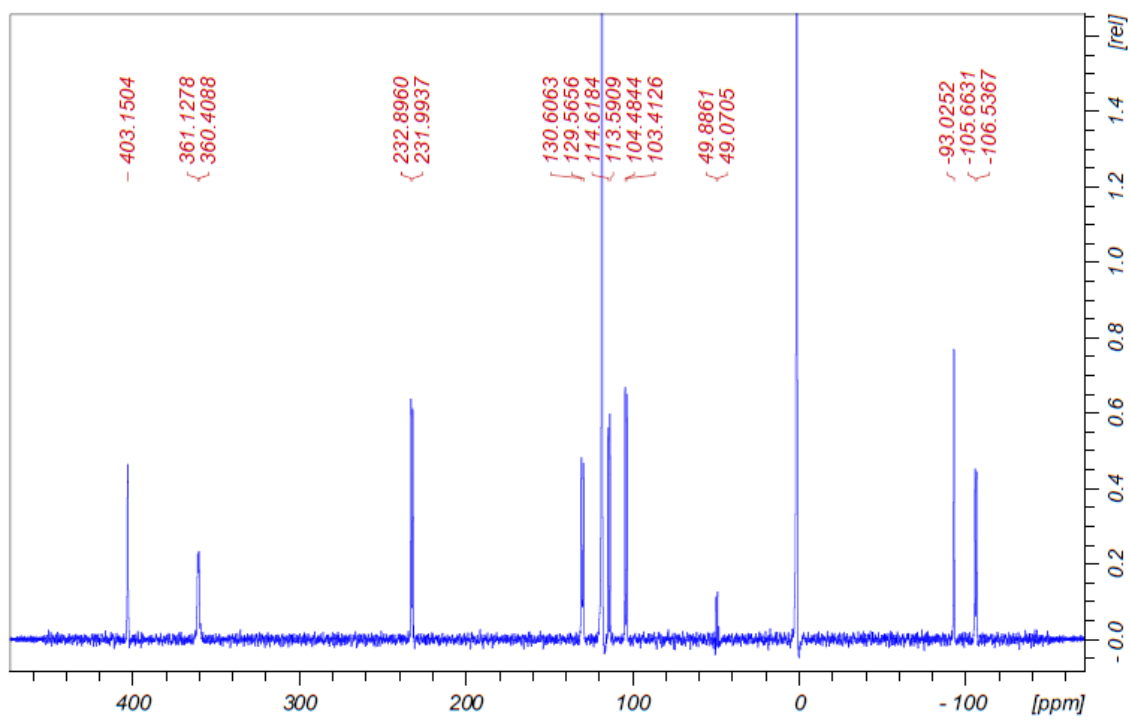

Figure S43:  $^{13}\text{C}$ -NMR spectrum of complex  $\text{Fe}(\text{MeOppz})_3$  in  $\text{CD}_3\text{CN}$

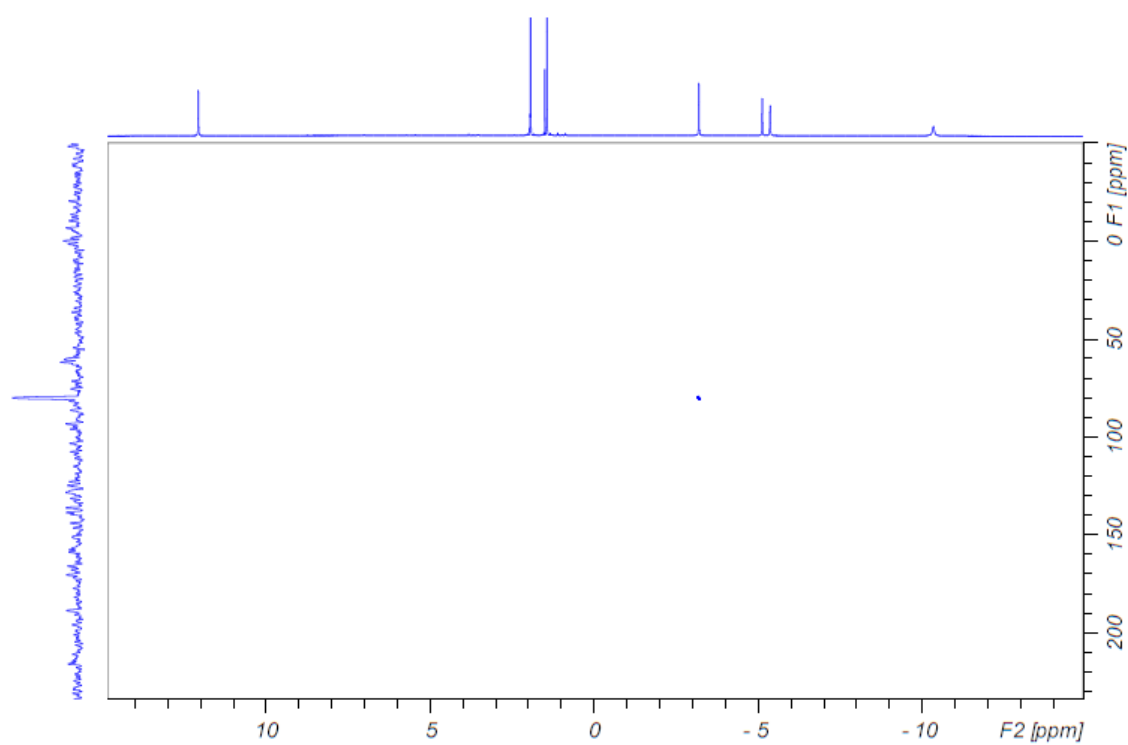

Figure S44:  $^{15}\text{N}$ -HMBC spectrum of  $\text{Fe}(\text{MeOppz})_3$  in  $\text{CD}_3\text{CN}$

MeCN

TH-516-1-ESI-pos 1 (0.052)

1: TOF MS ES+  
8.08e5

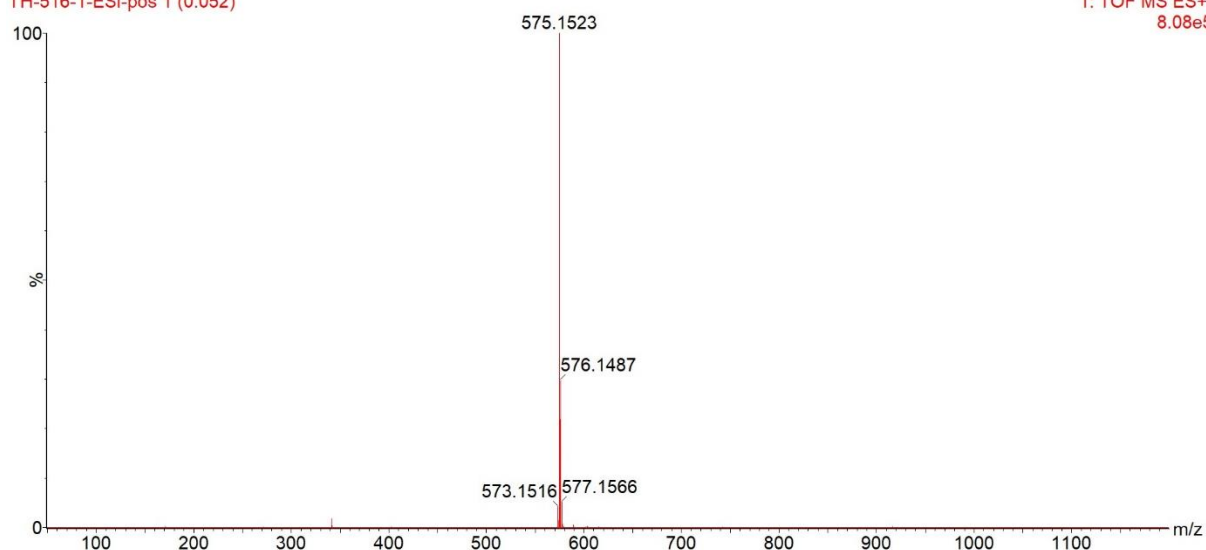

Figure S45: ESI-MS spectrum of complex  $\text{Fe}(\text{MeOppz})_3$  in  $\text{CH}_3\text{CN}$

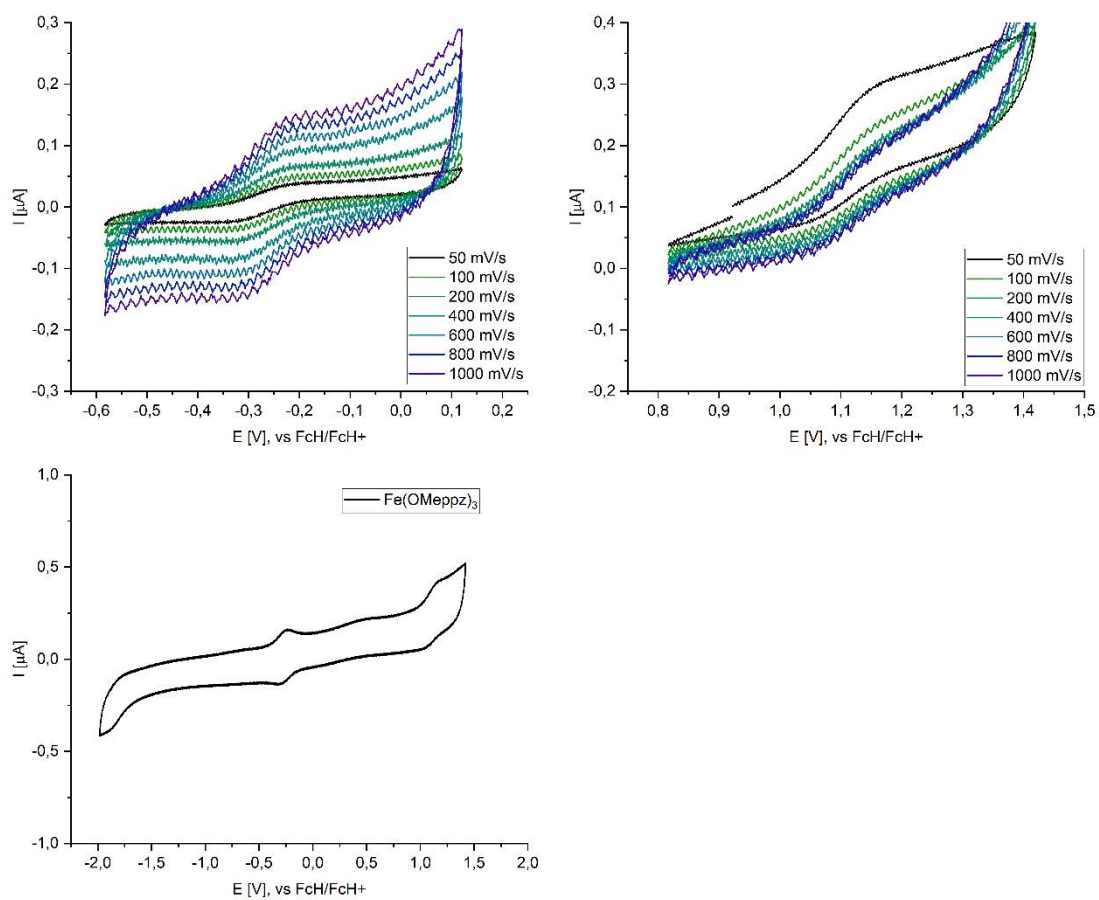

Figure S46: Cyclic voltammograms spectra of complex  $\text{Fe}(\text{MeOppz})_3$  in  $\text{CH}_3\text{CN}$

**Table S12:** Cyclic voltammetry data for Fe(MeOppz)<sub>3</sub> at different scan rates, first redox step

| SCANRATE                         | [MV/S] | 50     | 100    | 200    | 400    | 600    | 800    | 1000   |
|----------------------------------|--------|--------|--------|--------|--------|--------|--------|--------|
| E <sub>PC</sub>                  | [V]    | -1,746 | -1,753 | -1,751 | -1,748 | -1,751 | -1,748 | -1,751 |
| E <sub>PA</sub>                  | [V]    | -1,814 | -1,812 | -1,814 | -1,812 | -1,817 | -1,814 | -1,819 |
| E <sub>1/2</sub>                 | [V]    | -1,78  | -1,78  | -1,78  | -1,78  | -1,78  | -1,78  | -1,78  |
| ΔE                               | [V]    | -0,068 | -0,059 | -0,063 | -0,063 | -0,066 | -0,066 | -0,068 |
| I <sub>PC</sub>                  | [μA]   | -1,18  | -1,61  | -2,34  | -3,35  | -4,11  | -4,71  | -5,33  |
| I <sub>PA</sub>                  | [μA]   | 1,27   | 1,80   | 2,52   | 3,59   | 4,37   | 5,03   | 5,57   |
| I <sub>PA</sub> /I <sub>PC</sub> |        | -1,08  | -1,12  | -1,08  | -1,07  | -1,06  | -1,07  | -1,04  |

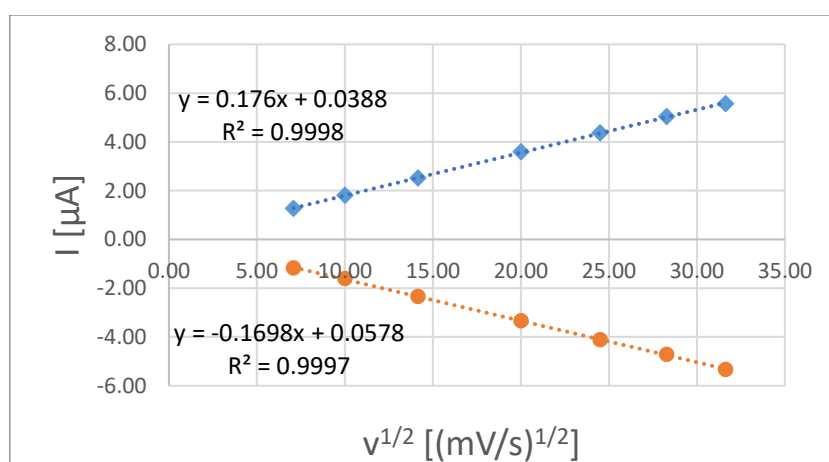

**Figure S47:** Plotted data of Randles-Sevcik-Equation Fe(MeOppz)<sub>3</sub> at different scan rates, first redox step

**Table S13:** Cyclic voltammetry data for Fe(MeOppz)<sub>3</sub> at different scan rates, second redox step

| SCANRATE                         | [MV/S] | 50     | 100    | 200    | 400    | 600    | 800    | 1000   |
|----------------------------------|--------|--------|--------|--------|--------|--------|--------|--------|
| E <sub>PC</sub>                  | [V]    | -0,268 | -0,265 | -0,265 | -0,275 | -0,268 | -0,265 | -0,265 |
| E <sub>PA</sub>                  | [V]    | -0,207 | -0,204 | -0,197 | -0,199 | -0,197 | -0,199 | -0,207 |
| E <sub>1/2</sub>                 | [V]    | -0,24  | -0,23  | -0,23  | -0,24  | -0,23  | -0,23  | -0,24  |
| ΔE                               | [V]    | 0,061  | 0,061  | 0,068  | 0,076  | 0,071  | 0,066  | 0,059  |
| I <sub>PC</sub>                  | [μA]   | -1,28  | -1,72  | -2,54  | -3,62  | -4,41  | -5,05  | -5,62  |
| I <sub>PA</sub>                  | [μA]   | 1,27   | 1,82   | 2,56   | 3,52   | 4,35   | 5,06   | 5,61   |
| I <sub>PA</sub> /I <sub>PC</sub> |        | -0,99  | -1,06  | -1,01  | -0,97  | -0,99  | -1,00  | -1,00  |

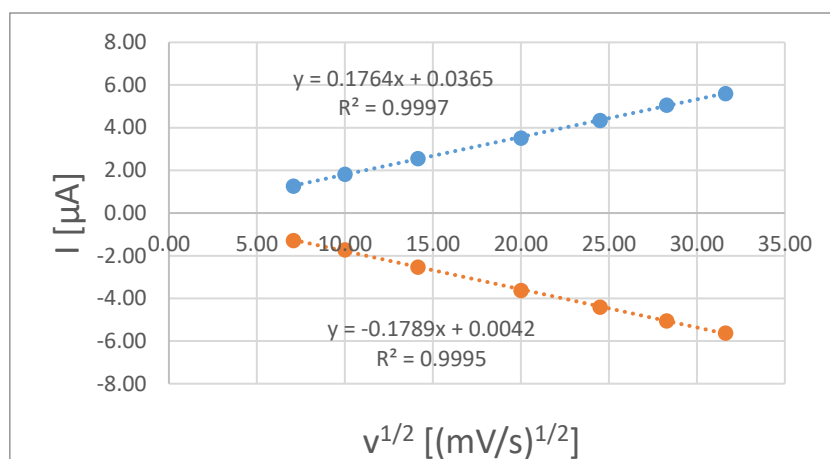

**Figure S48:** Plotted data of Randles-Sevcik-Equation Fe(MeOppz)<sub>3</sub> at different scan rates, second redox step

**Table S14:** Cyclovoltammetry data for Fe(MeOppz)<sub>3</sub> at different scan rates, second redox step

| SCANRATE        | [MV/S] | 50    | 100   | 200   | 400   | 600   | 800   | 1000  |
|-----------------|--------|-------|-------|-------|-------|-------|-------|-------|
| $E_{PC}$        | [V]    | 1,023 | 1,023 | 1,027 | 1,018 | 1,018 | 1,013 | 1,013 |
| $E_{PA}$        | [V]    | 1,091 | 1,088 | 1,096 | 1,093 | 1,103 | 1,103 | 1,106 |
| $E_{1/2}$       | [V]    | 1,06  | 1,06  | 1,06  | 1,06  | 1,06  | 1,06  | 1,06  |
| $\Delta E$      | [V]    | 0,068 | 0,066 | 0,068 | 0,076 | 0,086 | 0,090 | 0,093 |
| $I_{PC}$        | [μA]   | -1,29 | -1,73 | -2,10 | -3,24 | -3,84 | -4,31 | -4,72 |
| $I_{PA}$        | [μA]   | 0,94  | 1,38  | 1,90  | 2,71  | 3,27  | 3,67  | 4,05  |
| $I_{PA}/I_{PC}$ |        | -0,73 | -0,80 | -0,91 | -0,84 | -0,85 | -0,85 | -0,86 |

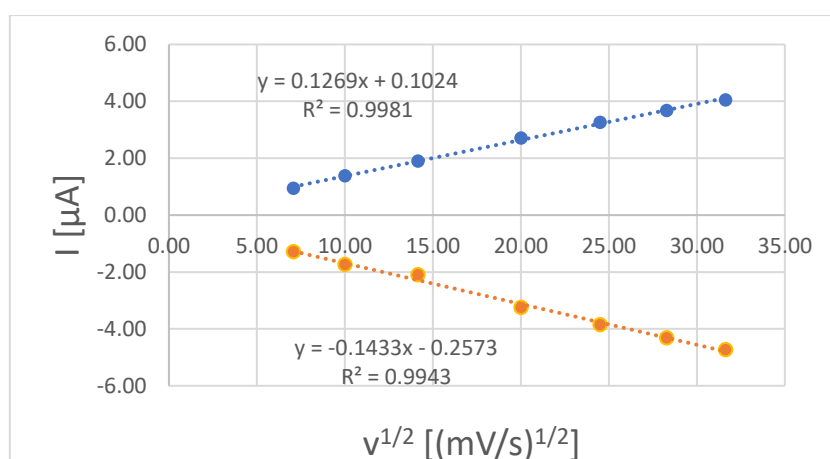

**Figure S49:** Plotted data of Randles-Sevcik-Equation Fe(MeOppz)<sub>3</sub> at different scan rates, third redox step

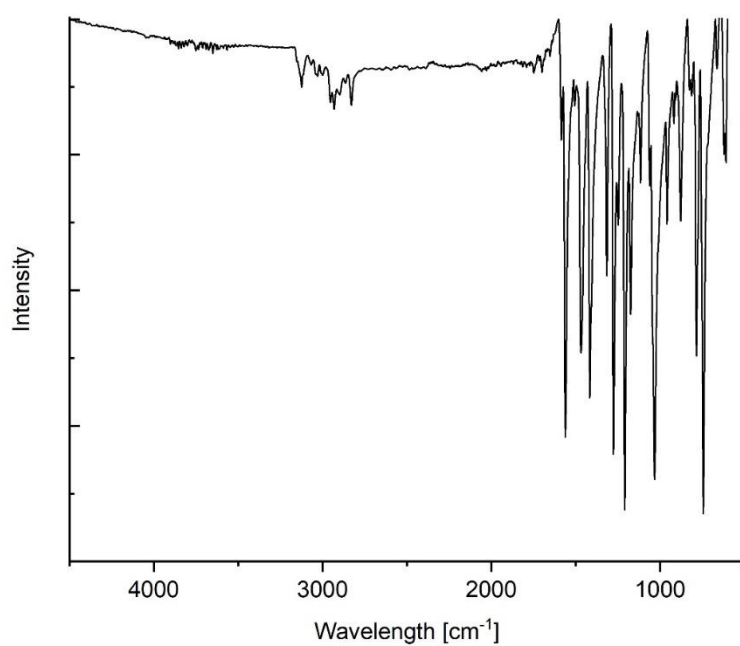

Figure S50: ATR-IR spectrum of complex  $\text{Fe}(\text{MeOppz})_3$

## Illumination Experiments

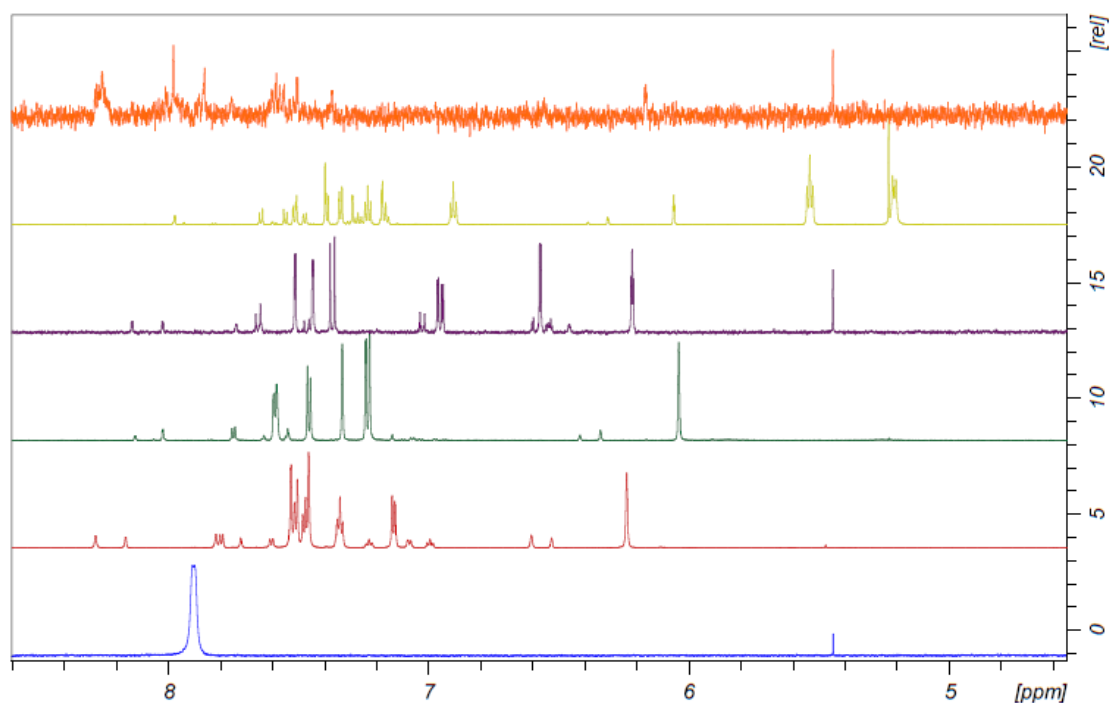

Figure S51: Experiments on complex stability in acetonitrile solution: before illumination of  $\text{Fe}(\text{ppz})_3$  (blue), after illumination of 24 h:  $\text{Fe}(\text{ppz})_3$  (red),  $\text{Fe}(\text{CF}_3\text{ppz})_3$  (green),  $\text{Fe}(\text{MeOppz})_3$  (purple),  $\text{Fe}(\text{bppz})_3$  (yellow),  $\text{Fe}(\text{naphpz})_3$  (orange, pure solubility decreases signal intensity)



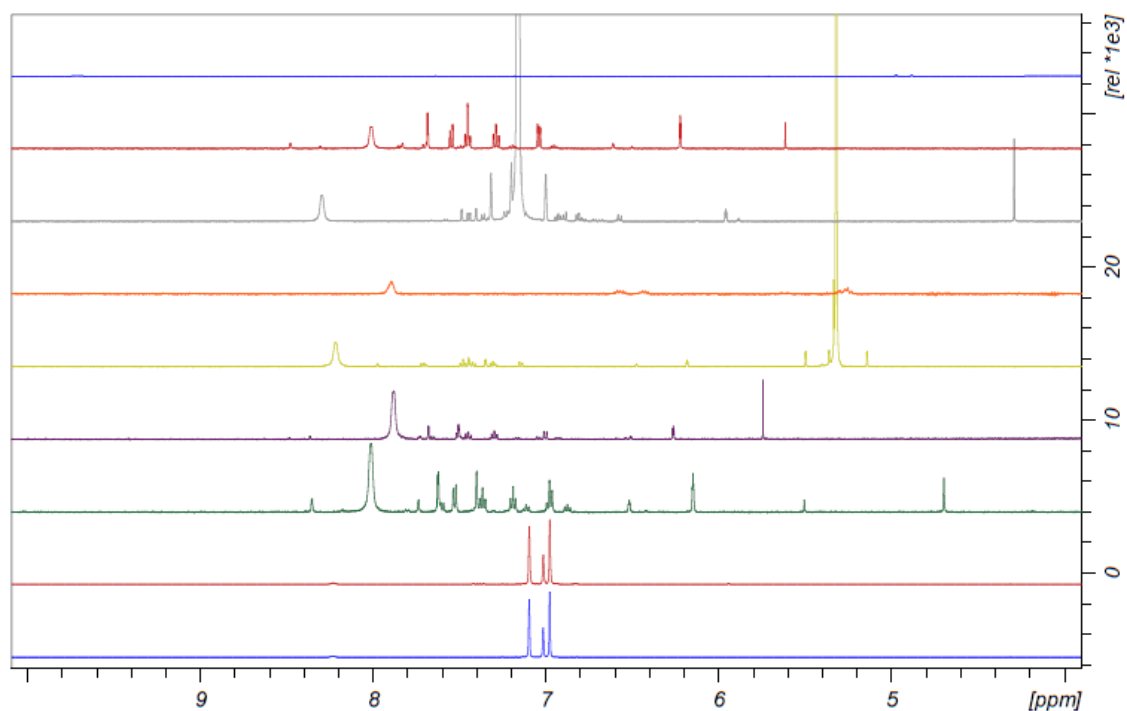

**Figure S52:** Experiments on complex stability exemplarily for  $\text{Fe}(\text{ppz})_3$ , bottom blue: before illumination in toluene (blue), from there upwards after illumination: toluene (red), THF (green), DMSO (purple), DCM (yellow), BuCN (orange), benzene (grey), acetone (red), 2Me-THF (blue).

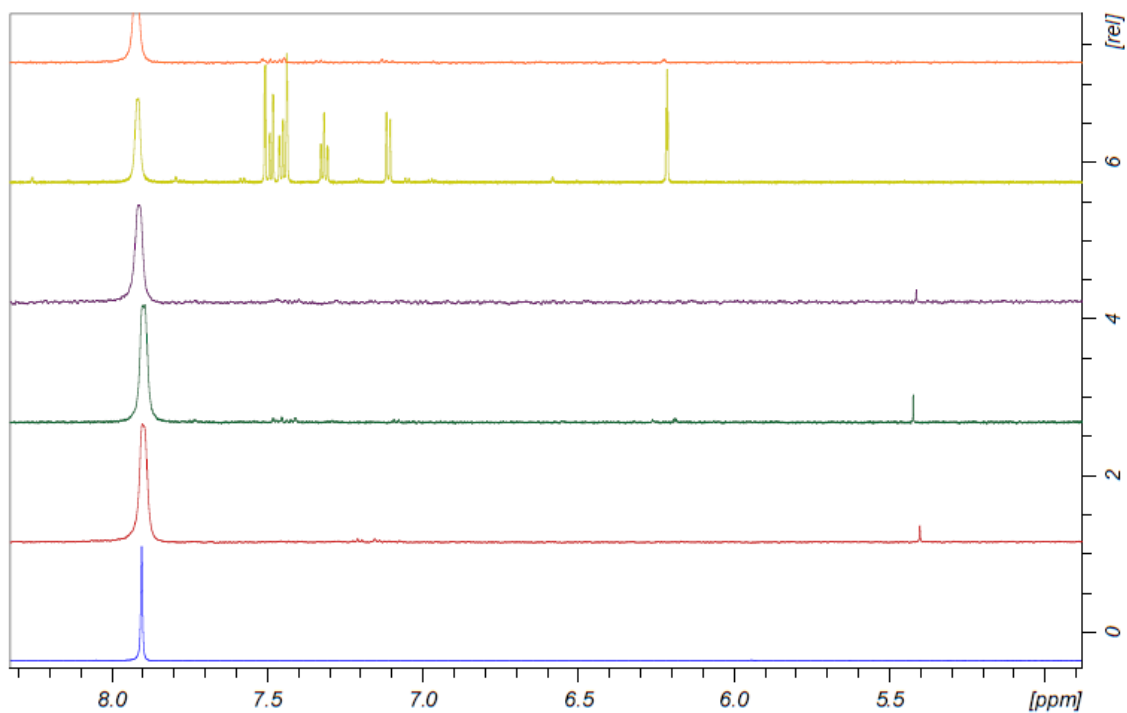

**Figure S53:** Decomposition of  $\text{Fe}(\text{ppz})_3$ , with different filters. Blue: before irradiation; red: 320 nm bandwidth filter, green: 360 nm bandwidth filter, purple: 390 nm bandwidth filter; yellow: 400 nm longpass filter, orange: 495 nm longpass filter. At 7.90 ppm complex signal, additional diamagnetic species in yellow spectra is the product of the reductive elimination.

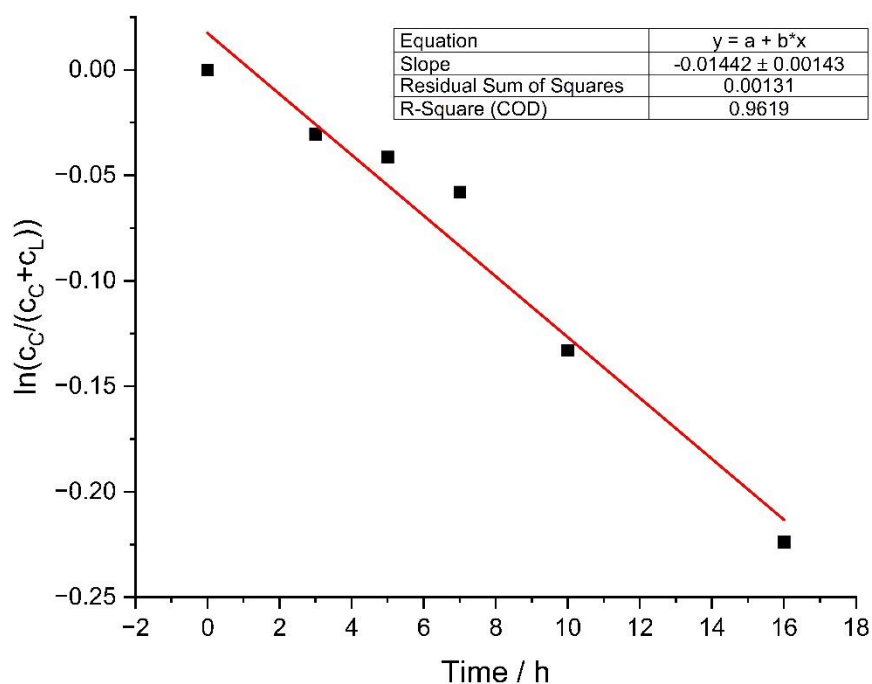

**Figure S54:** Calculated slope of the decomposition of  $\text{Fe}(\text{ppz})_3$ , based on the relative intensities of TMS, the product of the reductive illumination at 6.21 ppm and the complex resonance at 7.90 ppm.

## Computational

**Table S15:** Differential Gibbs free energy of PbEh-3c optimized structures excluding and including the SMD model for MeCN and BuCN implemented in ORCA. Negative values account for higher stability.

|                                  | $\Delta$ Gibbs free energy [kcal/mol] |        |        |
|----------------------------------|---------------------------------------|--------|--------|
| solvent                          | none                                  | MeCN   | BuCN   |
| <i>fac</i> -Co(ppz) <sub>3</sub> | 0                                     | -30.67 | -32.05 |
| <i>fac</i> -Fe(ppz) <sub>3</sub> | 0                                     | -31.35 | -32.73 |
| Co(II) species                   | 0                                     | -58.16 | -59.10 |
| Fe(II) species                   | 0                                     | -58.9  | -59.91 |

**Table S16:** Absolute an differential Gibbs free energy of PbEh-3c optimized structures of fac- and mer- isomers.

|                                          | Gibbs energy [kcal·mol <sup>-1</sup> ] |                    |                          |
|------------------------------------------|----------------------------------------|--------------------|--------------------------|
|                                          | <i>fac</i> -isomer                     | <i>mer</i> -isomer | $\Delta(\text{fac-mer})$ |
| <b>Fe(naphpz)<sub>3</sub></b>            | -1946262.77                            | -1946262.19        | -0.58                    |
| <b>Fe(bppz)<sub>3</sub></b>              | -2092187.62                            | -2092186.16        | -1.46                    |
| <b>Fe(MeOppz)<sub>3</sub></b>            | -1872534.07                            | -1872536.20        | 2.13                     |
| <b>Fe(CF<sub>3</sub>ppz)<sub>3</sub></b> | -2292413.78                            | -2292412.94        | -0.84                    |
| <b>Fe(ppz)<sub>3</sub></b>               | -1656600.74                            | -1656600.11        | -0.63                    |

**Table S17:** Comparison of the bond length and binding angles for the single crystal structure analysis and PBEh-3c geometry optimized fac-complexes.

| complex                                  | Experimental data           |                             |                                  | Computational data          |                             |                                               |
|------------------------------------------|-----------------------------|-----------------------------|----------------------------------|-----------------------------|-----------------------------|-----------------------------------------------|
|                                          | $\text{Fe-N } [\text{\AA}]$ | $\text{Fe-C } [\text{\AA}]$ | $\angle \text{C-Fe-N } [^\circ]$ | $\text{Fe-N } [\text{\AA}]$ | $\text{Fe-C } [\text{\AA}]$ | $\angle \text{C-Fe-N}_{(\text{ax})} [^\circ]$ |
| <b>Fe(naphpz)<sub>3</sub></b>            | 2.0134(12)                  | 1.9530(17)                  | 169.99(7)                        | 2.019                       | 1.952                       | 174.5                                         |
| <b>Fe(bppz)<sub>3</sub></b>              | 2.0122(7)                   | 1.9536(7)                   | 172.90(1)                        | 2.018                       | 1.952                       | 174.8                                         |
| <b>Fe(MeOppz)<sub>3</sub></b>            | 2.0129(15)                  | 1.9512(13)                  | 170.89(5)                        | 2.020                       | 1.956                       | 174.3                                         |
| <b>Fe(CF<sub>3</sub>ppz)<sub>3</sub></b> | 2.0075(15)                  | 1.9520(16)                  | 170.46(6)                        | 2.015                       | 1.956                       | 174.5                                         |
| <b>Fe(ppz)<sub>3</sub></b>               | 2.0030(15)                  | 1.9508(13)                  | 171.54(7)                        | 2.020                       | 1.954                       | 173.7                                         |

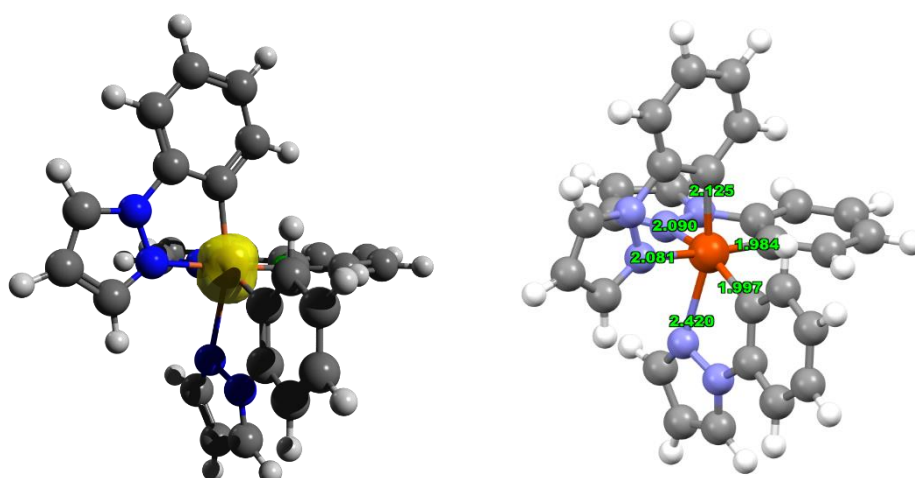

**Figure S55:** PBEh-3c optimized lowest quartet state of fac-Fe(ppz)<sub>3</sub>. Left: Spin density plot. Right: Depicted Fe-ligand bond lengths.

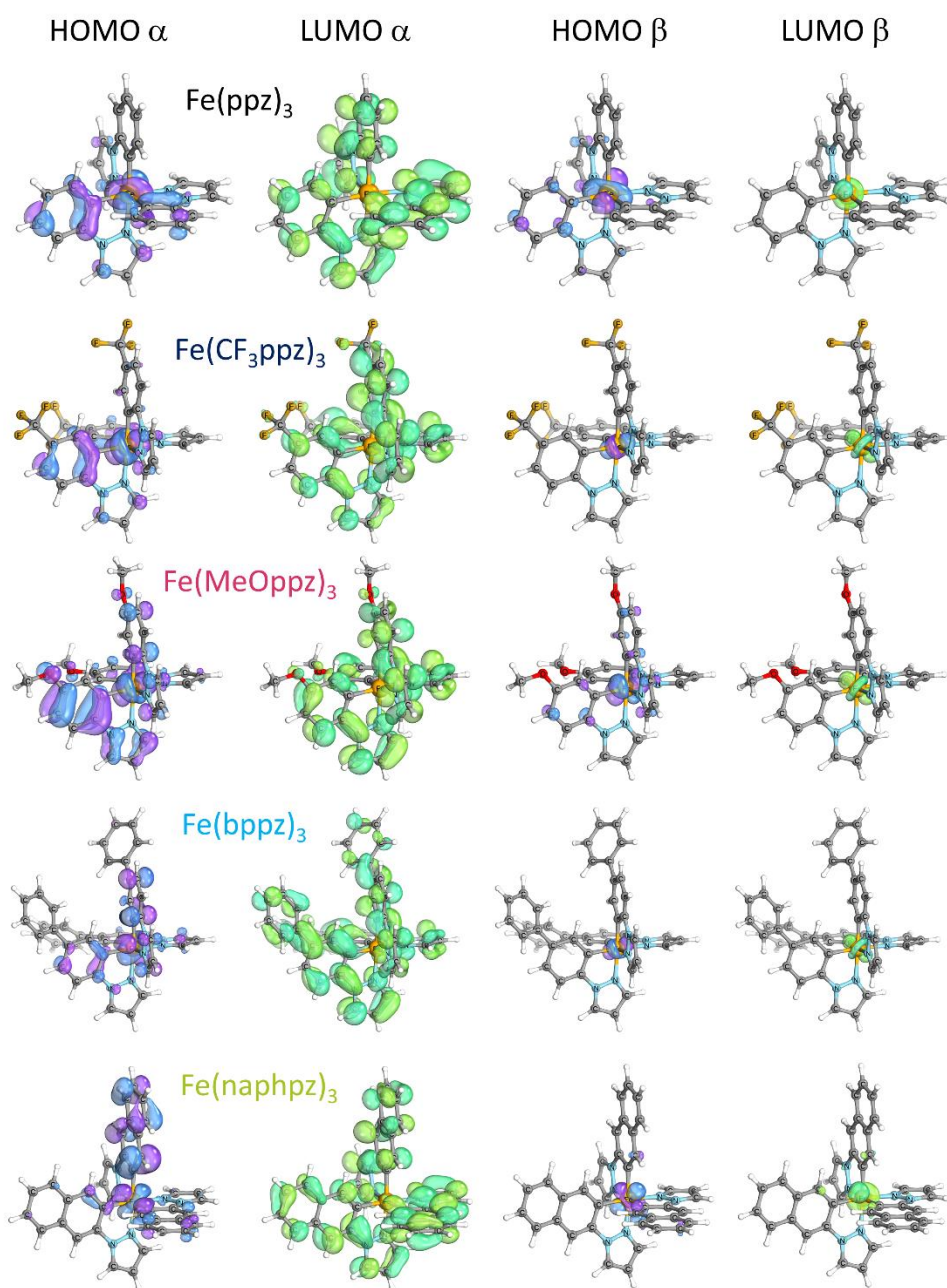

**Figure S56:** TPSSh/def2-TZVP calculated spatial distribution of the frontier orbitals of the respective complexes.

**Table S18:** Analysis of the main acceptor and donor orbital contribution to the TD-DFT calculated vertical transitions (Fig. 5) of fac-Fe(ppz)<sub>3</sub>. The lettering of the transitions a-h refers to the assigned transitions in Fig. 5. Additionally, the calculated wavelength  $\lambda$  and oscillator strength  $f$  is given for the selected transitions.

| Transition                                               | Main Donor Orbitals                                                                                   | Main Acceptor Orbitals                                                                                  | Contribution to the transition |
|----------------------------------------------------------|-------------------------------------------------------------------------------------------------------|---------------------------------------------------------------------------------------------------------|--------------------------------|
| <b>a</b><br>$\lambda = 451 \text{ nm}$ ,<br>$f = 0.0022$ | 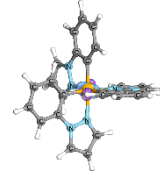<br>HOMO $\beta$     | <br>LUMO+8 $\beta$    | 13%                            |
|                                                          | <br>HOMO-1 $\beta$   | <br>LUMO+7 $\beta$    | 11%                            |
|                                                          | <br>HOMO $\alpha$    | <br>LUMO+5 $\alpha$   | 10%                            |
| <b>b</b><br>$\lambda = 449 \text{ nm}$<br>$f = 0.0022$   | <br>HOMO $\beta$    | <br>LUMO+7 $\beta$   | 13%                            |
|                                                          | <br>HOMO-1 $\beta$ | <br>LUMO+8 $\beta$  | 11%                            |
|                                                          | <br>HOMO $\alpha$  | <br>LUMO+3 $\alpha$ | 10%                            |
| <b>c</b><br>$\lambda = 400 \text{ nm}$<br>$f = 0.0085$   | <br>HOMO $\beta$   | <br>LUMO+1 $\beta$  | 84%                            |
| <b>d</b><br>$\lambda = 388 \text{ nm}$<br>$f = 0.0128$   | <br>HOMO-1 $\beta$ | <br>LUMO+3 $\beta$  | 30%                            |
|                                                          | <br>HOMO $\beta$   | <br>LUMO+2 $\beta$  | 30%                            |

|                                                         |                                                                                                        |                                                                                                         |     |
|---------------------------------------------------------|--------------------------------------------------------------------------------------------------------|---------------------------------------------------------------------------------------------------------|-----|
| <b>d'</b><br>$\lambda = 389 \text{ nm}$<br>$f = 0.0108$ | 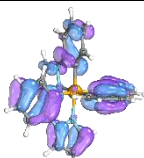<br>HOMO-2 $\beta$    | <br>LUMO $\beta$      | 58% |
| <b>e</b><br>$\lambda = 351 \text{ nm}$<br>$f = 0.0159$  | <br>HOMO $\alpha$     | <br>LUMO+3 $\alpha$   | 15% |
|                                                         | <br>HOMO-1 $\alpha$   | <br>LUMO+1 $\alpha$   | 12% |
|                                                         | <br>HOMO-1 $\alpha$   | <br>LUMO $\alpha$     | 10% |
| <b>f</b><br>$\lambda = 346 \text{ nm}$<br>$f = 0.0251$  | <br>HOMO $\alpha$    | <br>LUMO $\alpha$    | 68% |
| <b>g</b><br>$\lambda = 281 \text{ nm}$<br>$f = 0.0328$  | <br>HOMO-2 $\beta$  | <br>LUMO+1 $\beta$  | 26% |
|                                                         | <br>HOMO $\alpha$   | <br>LUMO+5 $\alpha$ | 16% |
|                                                         | <br>HOMO-2 $\alpha$ | <br>LUMO+3 $\alpha$ | 7%  |
| <b>h</b><br>$\lambda = 264 \text{ nm}$<br>$f = 0.2085$  | <br>HOMO-4 $\alpha$ | <br>LUMO+2 $\alpha$ | 10% |
|                                                         | <br>HOMO-3 $\alpha$ | <br>LUMO+1 $\alpha$ | 9%  |

|  |                                                                                                     |                                                                                                      |    |
|--|-----------------------------------------------------------------------------------------------------|------------------------------------------------------------------------------------------------------|----|
|  | 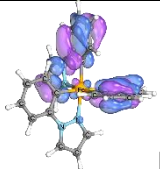<br>HOMO-4 $\beta$ | <br>LUMO+3 $\beta$ | 7% |
|  | <br>HOMO-3 $\beta$ | <br>LUMO+2 $\beta$ | 7% |
|  | <br>HOM-5 $\alpha$ | <br>LUMO $\alpha$  | 6% |

### X-ray emission spectroscopy

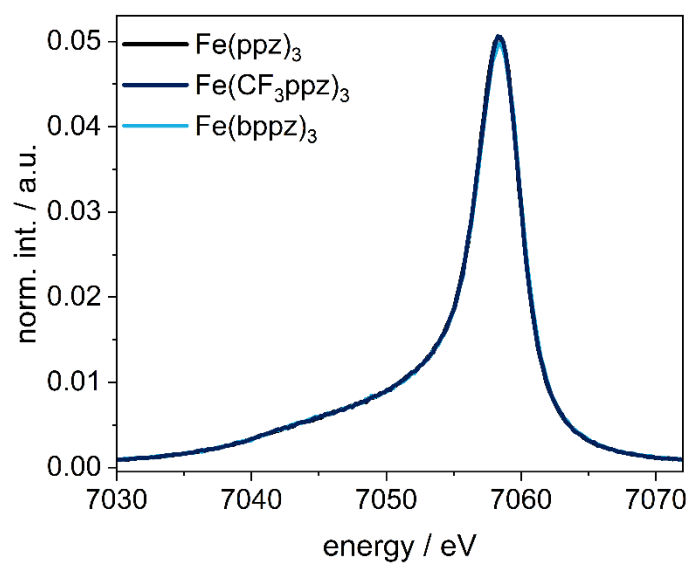

**Figure S57:** Experimental CtC spectra of  $\text{Fe}(\text{ppz})_3$ ,  $\text{Fe}(\text{bppz})_3$ ,  $\text{Fe}(\text{CF}_3\text{ppz})_3$  with different substituents.

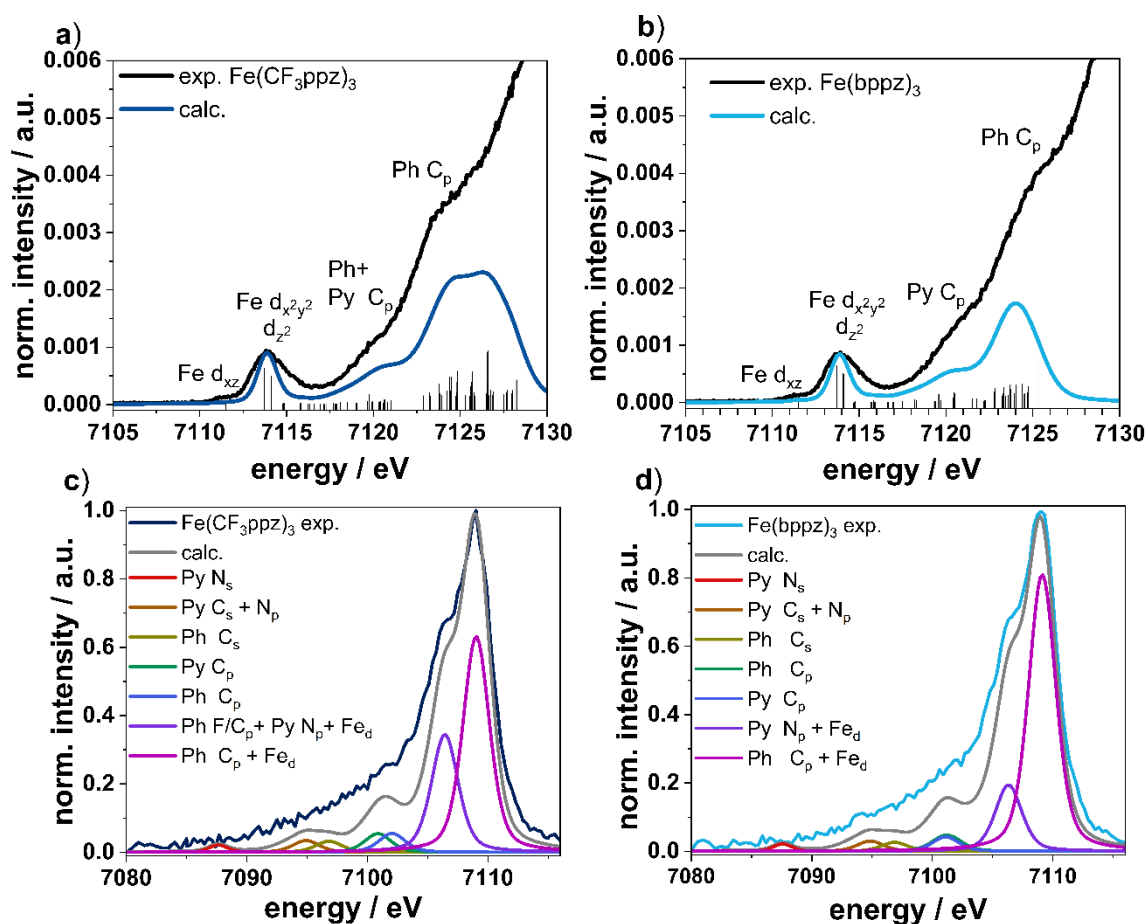

**Figure S58:** Comparison of experimental and calculated XANES (a, b) and VtC (c, d) spectra with main character of acceptor (a, b) and donor (c, d) orbitals orbital components for Pyrazol (Py) and Phenyl (Ph) accountable for the peak.

## Single Crystal X-Ray Diffraction

The presented X-ray single crystal data were collected on a *Bruker Venture D8* three-cycle diffractometer equipped with a Mo  $K_\alpha$   $\mu$ -source ( $\lambda=0.71073$  Å). Monochromatization of the radiation was obtained using *Incoatec* multilayer Montel optics and a Photon III area detector was used for data acquisition. All crystals were kept at 120 K during measurement.

Data processing was carried out using the *Bruker APEX 4* software package: This includes SAINT for data integration and SADABS for a multi-scan absorption correction. Structure solution was obtained by direct methods and the refinement of the structures using full-matrix least squares method based on  $F^2$  were achieved in SHELX.<sup>3,4</sup> All non-hydrogen-atoms were refined anisotropically and the hydrogen atom positions were refined at idealized positions riding on the carbon atoms with isotropic displacement parameters  $U_{iso}(H)=1.2 U_{eq}(C)$  resp.  $1.5 U_{eq}(-CH_3)$  and C-H bond lengths of 0.93-0.96 Å. All  $CH_3$  hydrogen atoms were allowed to rotate but not to tip.

**Crystallographic data have been deposited at the Cambridge Crystallographic Data Centre assigned to the deposition numbers 2191100-2191104. Copies are available free of charge via [www.ccdc.cam.ac.uk](http://www.ccdc.cam.ac.uk).**



## Crystallographic data

### Tris(2-phenylpyrazolato-*N,C*<sup>2</sup>)iron(III) Fe(ppz)<sub>3</sub>

|                                   |                                                                                         |
|-----------------------------------|-----------------------------------------------------------------------------------------|
| CCDC number                       | 2191100                                                                                 |
| Empirical formula                 | C <sub>55</sub> H <sub>44</sub> Cl <sub>2</sub> Fe <sub>2</sub> N <sub>12</sub>         |
| Moiety formula                    | C <sub>27</sub> H <sub>21</sub> N <sub>6</sub> Fe                                       |
| Formula weight                    | 1055.62 Da                                                                              |
| Color                             | brown                                                                                   |
| Shape                             | needle                                                                                  |
| Temperature                       | 119(2) K                                                                                |
| Wavelength                        | 0.71073 Å                                                                               |
| Crystal system                    | Orthorhombic                                                                            |
| Space group                       | P2 <sub>1</sub> 2 <sub>1</sub> 2 <sub>1</sub>                                           |
| Unit cell dimensions              | a = 13.6656(7) Å<br>b = 15.4759(8) Å<br>c = 22.6671(11) Å                               |
| Volume                            | 4793.8(4) Å <sup>3</sup>                                                                |
| Z                                 | 4                                                                                       |
| Density (calculated)              | 1.463 mg/m <sup>3</sup>                                                                 |
| Absorption coefficient            | 0.770 mm <sup>-1</sup>                                                                  |
| F(000)                            | 2176                                                                                    |
| Crystal size                      | 0.300 x 0.060 x 0.020 mm <sup>3</sup>                                                   |
| Theta range for data collection   | 2.182 to 30.524°                                                                        |
| Index ranges                      | -19 ≤ h ≤ 19, -22 ≤ k ≤ 22, -32 ≤ l ≤ 32                                                |
| Reflections collected             | 144195                                                                                  |
| Independent reflections           | 14658 [R(int) = 0.0379]                                                                 |
| Completeness to theta = 25.242°   | 99.8 %                                                                                  |
| Absorption correction             | Semi-empirical from equivalents                                                         |
| Refinement method                 | Full-matrix least-squares on F <sup>2</sup>                                             |
| Data / restraints / parameters    | 14658 / 0 / 641                                                                         |
| Goodness-of-fit on F <sup>2</sup> | 1.075                                                                                   |
| Final R indices [I > 2σ(I)]       | R1 = 0.0270, wR2 = 0.0694                                                               |
| R indices (all data)              | R1 = 0.0321, wR2 = 0.0737                                                               |
| Absolute structure parameter      | 0.397(10)                                                                               |
| Largest diff. peak and hole       | 0.499 e/Å <sup>3</sup> (0.51 Å from H223) and -0.367 e/Å <sup>3</sup> (0.52 Å from Fe1) |

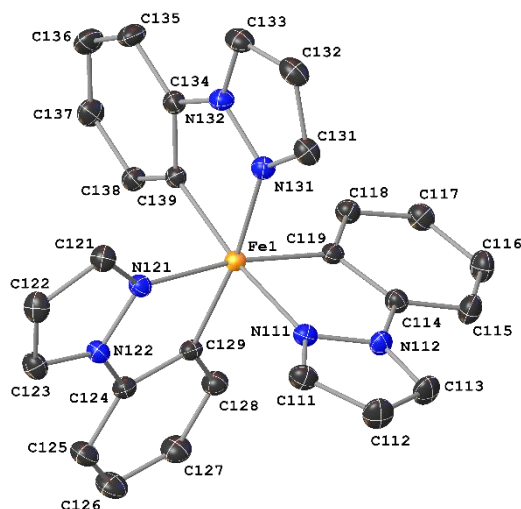

The structure was refined as an inversion twin (BASF=0.39746)

**Tris(1-([1,1'-biphenyl]-4-yl)phenyl)pyrazolato-*N,C*<sup>2</sup>)iron(III) Fe(bppz)<sub>3</sub>**

|                                   |                                                                                       |
|-----------------------------------|---------------------------------------------------------------------------------------|
| CCDC number                       | 2191101                                                                               |
| Empirical formula                 | C <sub>46.20</sub> H <sub>35.40</sub> Cl <sub>2.40</sub> Fe N <sub>6</sub>            |
| Moiety formula                    | C <sub>45</sub> H <sub>33</sub> Fe N <sub>6</sub>                                     |
| Formula weight                    | 815.53 Da                                                                             |
| Color                             | red                                                                                   |
| Shape                             | prism                                                                                 |
| Temperature                       | 120(2) K                                                                              |
| Wavelength                        | 0.71073 Å                                                                             |
| Crystal system                    | Trigonal                                                                              |
| Space group                       | R-3                                                                                   |
| Unit cell dimensions              | a = 14.3819(5) Å<br>b = 14.3819(5) Å<br>c = 32.0647(16) Å                             |
| Volume                            | 5743.7(5) Å <sup>3</sup>                                                              |
| Z                                 | 6                                                                                     |
| Density (calculated)              | 1.415 mg/m <sup>3</sup>                                                               |
| Absorption coefficient            | 0.605 mm <sup>-1</sup>                                                                |
| F(000)                            | 2528                                                                                  |
| Crystal size                      | 0.200 x 0.200 x 0.180 mm <sup>3</sup>                                                 |
| Theta range for data collection   | 2.833 to 36.372°                                                                      |
| Index ranges                      | -23 ≤ h ≤ 24, -24 ≤ k ≤ 23, -53 ≤ l ≤ 53                                              |
| Reflections collected             | 198137                                                                                |
| Independent reflections           | 6215 [R(int) = 0.0423]                                                                |
| Completeness to theta = 25.242°   | 99.7 %                                                                                |
| Absorption correction             | Semi-empirical from equivalents                                                       |
| Refinement method                 | Full-matrix least-squares on F <sup>2</sup>                                           |
| Data / restraints / parameters    | 6215 / 0 / 157                                                                        |
| Goodness-of-fit on F <sup>2</sup> | 1.046                                                                                 |
| Final R indices [I > 2σ(I)]       | R1 = 0.0332, wR2 = 0.0909                                                             |
| R indices (all data)              | R1 = 0.0368, wR2 = 0.0940                                                             |
| Largest diff. peak and hole       | 0.538 e/Å <sup>3</sup> (0.65 Å from C4) and -0.355 e/Å <sup>3</sup> (0.53 Å from Fe1) |

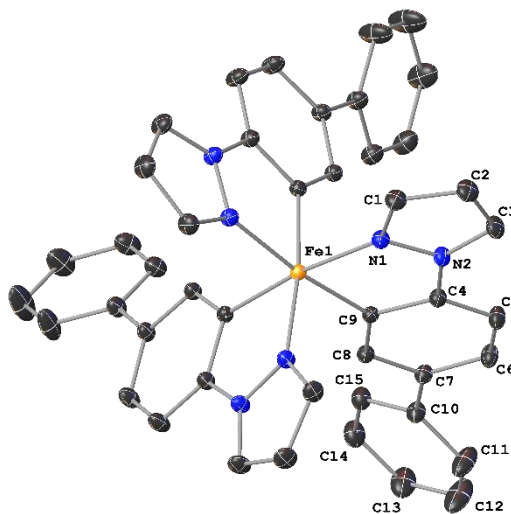

For refinement, two partially occupied dichloromethane molecules were treated with SQUEEZE from the PLATON software package.<sup>5</sup>

**Tris(1-(4-(trifluoromethyl)phenyl)pyrazolato-*N,C*<sup>2</sup>)iron(III) Fe(CF<sub>3</sub>ppz)<sub>3</sub>**

|                                   |                                                                                                                     |
|-----------------------------------|---------------------------------------------------------------------------------------------------------------------|
| CCDC number                       | 2191102                                                                                                             |
| Empirical formula                 | C <sub>67</sub> H <sub>44</sub> F <sub>18</sub> Fe <sub>2</sub> N <sub>12</sub>                                     |
| Moiety formula                    | C <sub>30</sub> H <sub>18</sub> F <sub>9</sub> Fe N <sub>6</sub>                                                    |
| Formula weight                    | 1470.84 Da                                                                                                          |
| Color                             | yellow                                                                                                              |
| Shape                             | plate                                                                                                               |
| Temperature                       | 120(2) K                                                                                                            |
| Wavelength                        | 0.71073 Å                                                                                                           |
| Crystal system                    | Triclinic                                                                                                           |
| Space group                       | P-1                                                                                                                 |
| Unit cell dimensions              | a = 13.5555(9) Å<br>b = 16.6300(10) Å<br>c = 16.8788(10) Å<br>α = 104.514(2)°<br>β = 108.952(2)°<br>γ = 109.287(2)° |
| Volume                            | 3111.8(3) Å <sup>3</sup>                                                                                            |
| Z                                 | 2                                                                                                                   |
| Density (calculated)              | 1.570 mg/m <sup>3</sup>                                                                                             |
| Absorption coefficient            | 0.575 mm <sup>-1</sup>                                                                                              |
| F(000)                            | 1488                                                                                                                |
| Crystal size                      | 0.100 x 0.100 x 0.020 mm <sup>3</sup>                                                                               |
| Theta range for data collection   | 2.339 to 32.121°                                                                                                    |
| Index ranges                      | -20 ≤ h ≤ 20, -24 ≤ k ≤ 24, -25 ≤ l ≤ 25                                                                            |
| Reflections collected             | 314702                                                                                                              |
| Independent reflections           | 21751 [R(int) = 0.0566]                                                                                             |
| Completeness to theta = 25.242°   | 99.9 %                                                                                                              |
| Absorption correction             | Semi-empirical from equivalents                                                                                     |
| Refinement method                 | Full-matrix least-squares on F <sup>2</sup>                                                                         |
| Data / restraints / parameters    | 21751 / 163 / 987                                                                                                   |
| Goodness-of-fit on F <sup>2</sup> | 1.080                                                                                                               |
| Final R indices [I > 2σ(I)]       | R1 = 0.0447, wR2 = 0.1024                                                                                           |
| R indices (all data)              | R1 = 0.0694, wR2 = 0.1226                                                                                           |
| Largest diff. peak and hole       | 1.147 e/Å <sup>3</sup> (0.77 from F21D) and -0.789 e/Å <sup>3</sup> (0.49 Å from F12I)                              |

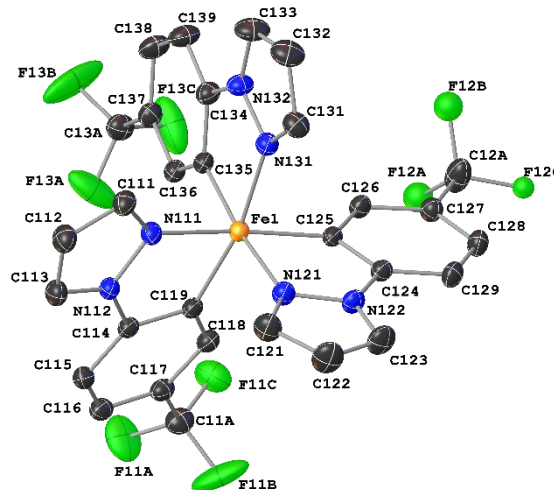

The asymmetric unit of the structure contains two complex molecules. Four CF<sub>3</sub>-groups tend to rotate and could be refined splitted in two positions, a fifth one in three positions. Due to this disorder, not all splitted atom groups could be refined anisotropically.

### Tris(1-(naphthalen-2-yl)pyrazolato-*N,C*<sup>2</sup>)iron(III) Fe(naphpz)<sub>3</sub>

|                                   |                                                                                         |
|-----------------------------------|-----------------------------------------------------------------------------------------|
| CCDC number                       | 2191103                                                                                 |
| Empirical formula                 | C52 H37 Fe N8                                                                           |
| Moiety formula                    | C39 H27 Fe N6                                                                           |
| Formula weight                    | 829.74 Da                                                                               |
| Color                             | orange                                                                                  |
| Shape                             | plate                                                                                   |
| Temperature                       | 120(2) K                                                                                |
| Wavelength                        | 0.71073 Å                                                                               |
| Crystal system                    | Monoclinic                                                                              |
| Space group                       | P2 <sub>1</sub> /n                                                                      |
| Unit cell dimensions              | a = 11.3521(10) Å<br>b = 30.655(3) Å<br>c = 12.3313(11) Å<br>β = 110.723(2)°            |
| Volume                            | 4013.7(6) Å <sup>3</sup>                                                                |
| Z                                 | 4                                                                                       |
| Density (calculated)              | 1.373 mg/m <sup>3</sup>                                                                 |
| Absorption coefficient            | 0.425 mm <sup>-1</sup>                                                                  |
| F(000)                            | 1724                                                                                    |
| Crystal size                      | 0.280 x 0.180 x 0.100 mm <sup>3</sup>                                                   |
| Theta range for data collection   | 2.030 to 30.546°                                                                        |
| Index ranges                      | -16 ≤ h ≤ 16, -43 ≤ k ≤ 43, -17 ≤ l ≤ 17                                                |
| Reflections collected             | 190973                                                                                  |
| Independent reflections           | 12271 [R(int) = 0.0682]                                                                 |
| Completeness to theta = 25.242°   | 99.9 %                                                                                  |
| Absorption correction             | Semi-empirical from equivalents                                                         |
| Refinement method                 | Full-matrix least-squares on F <sup>2</sup>                                             |
| Data / restraints / parameters    | 12271 / 0 / 550                                                                         |
| Goodness-of-fit on F <sup>2</sup> | 1.131                                                                                   |
| Final R indices [I > 2σ(I)]       | R1 = 0.0455, wR2 = 0.1075                                                               |
| R indices (all data)              | R1 = 0.0734, wR2 = 0.1274                                                               |
| Largest diff. peak and hole       | 1.196 e/Å <sup>3</sup> (0.63 Å from H405) and -0.698 e/Å <sup>3</sup> (0.69 Å from Fe1) |

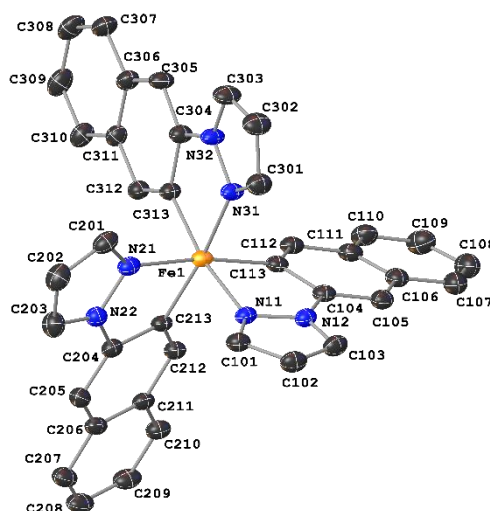

### Tris(1-(4-methoxyphenyl)pyrazolato-*N,C*<sup>2</sup>)iron(III) Fe(MeOppz)<sub>3</sub>

|                                   |                                                                                         |
|-----------------------------------|-----------------------------------------------------------------------------------------|
| CCDC number                       | 2191104                                                                                 |
| Empirical formula                 | C <sub>30</sub> H <sub>27</sub> Fe N <sub>6</sub> O <sub>3</sub>                        |
| Moiety formula                    | C <sub>30</sub> H <sub>27</sub> Fe N <sub>6</sub> O <sub>3</sub>                        |
| Formula weight                    | 575.42 Da                                                                               |
| Color                             | red                                                                                     |
| Shape                             | block                                                                                   |
| Temperature                       | 120(2) K                                                                                |
| Wavelength                        | 0.71073 Å                                                                               |
| Crystal system                    | Trigonal                                                                                |
| Space group                       | R-3                                                                                     |
| Unit cell dimensions              | a = 19.9138(11) Å<br>b = 19.9138(11) Å<br>c = 48.704(4) Å                               |
| Volume                            | 16727(2) Å <sup>3</sup>                                                                 |
| Z                                 | 24                                                                                      |
| Density (calculated)              | 1.371 mg/m <sup>3</sup>                                                                 |
| Absorption coefficient            | 0.584 mm <sup>-1</sup>                                                                  |
| F(000)                            | 7176                                                                                    |
| Crystal size                      | 0.18 x 0.18 x 0.10 mm <sup>3</sup>                                                      |
| Theta range for data collection   | 2.400 to 32.048°                                                                        |
| Index ranges                      | -29 ≤ h ≤ 29, -29 ≤ k ≤ 29, -72 ≤ l ≤ 72                                                |
| Reflections collected             | 660843                                                                                  |
| Independent reflections           | 12775 [R(int) = 0.0674]                                                                 |
| Completeness to theta = 25.242°   | 96.8 %                                                                                  |
| Absorption correction             | Semi-empirical from equivalents                                                         |
| Refinement method                 | Full-matrix least-squares on F <sup>2</sup>                                             |
| Data / restraints / parameters    | 12775 / 0 / 505                                                                         |
| Goodness-of-fit on F <sup>2</sup> | 1.143                                                                                   |
| Final R indices [I > 2σ(I)]       | R1 = 0.0350, wR2 = 0.0834                                                               |
| R indices (all data)              | R1 = 0.0530, wR2 = 0.0997                                                               |
| Largest diff. peak and hole       | 0.701 e/Å <sup>3</sup> (2.28 Å from H13D) and -0.556 e/Å <sup>3</sup> (0.64 Å from Fe1) |

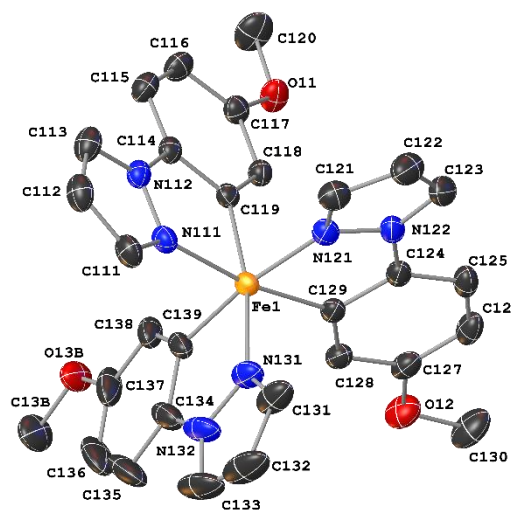

One methoxy group of the structure is disordered over two positions and could be refined anisotropically. Furthermore, two water molecules are only partially occupied (SOF < 0.2), could not be refined and were therefore treated using SQUEEZE from the PLATON software package.<sup>5</sup>

### References

- (1) Cristau, H.-J.; Cellier, P. P.; Spindler, J.-F.; Taillefer, M. Mild Conditions for Copper-Catalysed *N*-Arylation of Pyrazoles. *Eur. J. Org. Chem.* **2004**, 2004 (4), 695–709. DOI: 10.1002/ejoc.200300709.
- (2) Cristau, H.-J.; Cellier, P. P.; Spindler, J.-F.; Taillefer, M. Highly efficient and mild copper-catalyzed *N*- and *C*-arylations with aryl bromides and iodides. *Chem. Eur. J.* **2004**, 10 (22), 5607–5622. DOI: 10.1002/chem.200400582.
- (3) Sheldrick, G. M. Crystal structure refinement with SHELXL. *Acta crystallographica. Section C, Structural chemistry* **2015**, 71 (Pt 1), 3–8. DOI: 10.1107/S2053229614024218. Published Online: Jan. 1, 2015.

(4) Sheldrick, G. M. SHELXT - integrated space-group and crystal-structure determination. *Acta crystallographica. Section A, Foundations and advances* **2015**, 71 (Pt 1), 3–8. DOI: 10.1107/S2053273314026370. Published Online: Jan. 1, 2015.

(5) Spek, A. L. PLATON SQUEEZE: a tool for the calculation of the disordered solvent contribution to the calculated structure factors. *Acta crystallographica. Section C, Structural chemistry* **2015**, 71 (Pt 1), 9–18. DOI: 10.1107/S2053229614024929. Published Online: Jan. 1, 2015.
